# Supplementary material for: Oxatub[4]arene: a molecular “transformer” capable of hosting a wide range of organic cations
Source: Royal Society of Chemistry journal article supplement (doi:10.1039/c6cc01052k), 2016-01-01
Supplement: c6cc01052k1.pdf [file c6cc01052k1.pdf]

## Electronic Supplementary Information

# Oxatub[4]arene: A Molecular “Transformer” Capable of Hosting a Wide Range of Organic Cations

Fei Jia, Hao-Yi Wang, Dong-Hao Li, Liu-Pan Yang and Wei Jiang\*  
*Department of Chemistry, South University of Science and Technology of China,  
Xueyuan Blvd 1088, Nanshan District, Shenzhen, 518055, P. R. China*  
*\*E-mail: [jiangw@sustc.edu.cn](mailto:jiangw@sustc.edu.cn)*

## Table of Contents

|                                                  |     |
|--------------------------------------------------|-----|
| 1. Experimental Section                          | S2  |
| 2. <sup>1</sup> H NMR spectra of the Complexes   | S3  |
| 3. Mass Spectra of the Complexes                 | S15 |
| 4. Binding Constants Determined by ITC           | S21 |
| 5. Binding Constants Determined by NMR Titration | S23 |
| 6. Solvent-Dependent NMR Spectra                 | S31 |
| 7. 2D NMR Spectra of the Complexes               | S33 |

## 1. Experimental Section

**1.1 General.** All the reagents involved in this research were commercially available and used without further purification unless otherwise noted. Solvents were either employed as purchased or dried prior to use by standard laboratory procedures.  $^1\text{H}$  NMR, and  $^1\text{H}$ - $^1\text{H}$  ROESY NMR spectra were recorded on Bruker Avance-400 or 600 spectrometers. All chemical shifts are reported in *ppm* with residual solvents or TMS (tetramethylsilane) as the internal standards. Electrospray-ionization time-of-flight high-resolution mass spectrometry (ESI-TOF-HRMS) experiments were conducted on an applied Q EXACTIVE mass spectrometry system. Molecular simulations were performed at the Semi-Empirical PM6 level of theory by using Spartan'14 (Wavefunction, Inc.). The synthesis of Oxatub[4]arene (**TA4**) has been reported.<sup>1</sup>

**1.2 Isothermal titration calorimetry, ITC.** Titration experiments were carried out in 1,2-dichloroethane/ $\text{CH}_3\text{CN}$  1 : 1 (v/v) at 25 °C on a Nano ITC LV – 190  $\mu\text{L}$  (Waters GmbH, TA Instruments, Eschborn, Germany). In a typical experiment, a 190  $\mu\text{L}$  solution of **TA4** was placed in the sample cell at a concentration of 0.16 mM, and 50  $\mu\text{L}$  of a solution of the hexafluorophosphate salt (1.0 mM in the same solvent) was in the injection syringe. The titrations consisted of 25 consecutive injections of 1.96  $\mu\text{L}$  each with a 5 min interval between injections. Heats of dilution, measured by titration of the salt into the sample cell with blank solvent, were subtracted from each data set. All solutions were degassed prior to titration. The data were analysed using the instrumental internal software package and fitted with a 1:1 binding model. Errors are smaller than  $\pm 10\%$ .

---

<sup>1</sup> F. Jia, Z. He, L.-P. Yang, Z.-S. Pan, M. Yi, R.-W. Jiang and W. Jiang. *Chem. Sci.*, 2015, **6**, 6731-6738.

## 2. $^1\text{H}$ NMR spectra of the Complexes

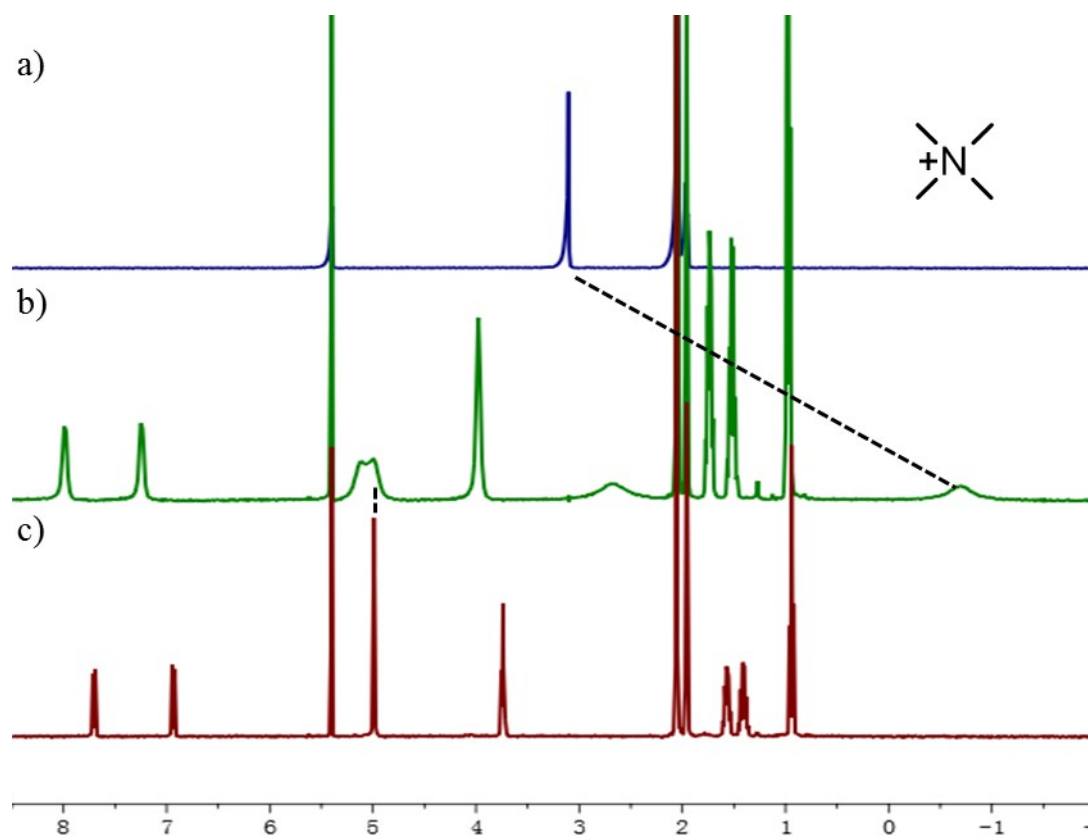

**Fig. S1**  $^1\text{H}$  NMR spectra (400 MHz,  $\text{CD}_2\text{Cl}_2:\text{CD}_3\text{CN}=1:1$ , 2.0 mM, 298 K) of (a) Guest **1-PF<sub>6</sub>**, (c) **TA4** and (b) their equimolar mixture. In the host-guest mixture, the protons of the guest shifted upfield, while the protons of **TA4** becomes slightly broadened and undergo downfield shift, suggesting the formation of the complex between **1-PF<sub>6</sub>** and **TA4**.

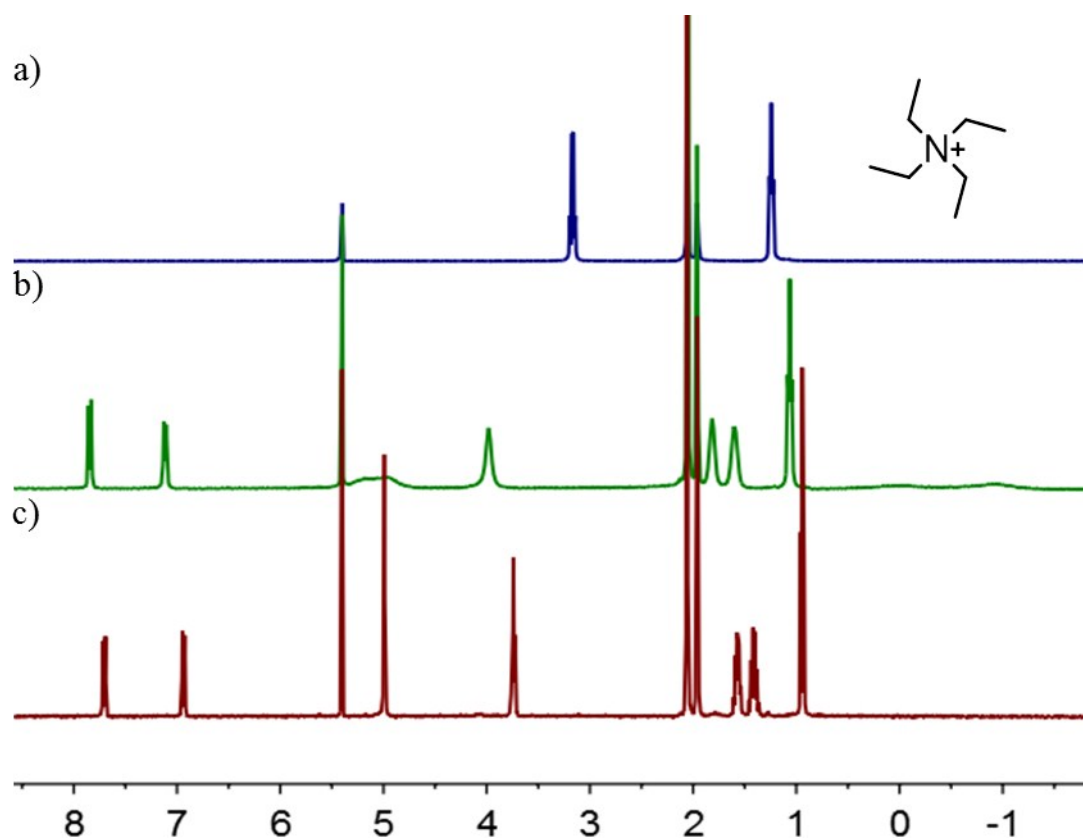

**Fig. S2**  $^1\text{H}$  NMR spectra (400 MHz,  $\text{CD}_2\text{Cl}_2:\text{CD}_3\text{CN}=1:1$ , 2.0 mM, 298 K) of (a) Guest **2-PF<sub>6</sub>**, (c) **TA4**, and (b) their equimolar mixture. In the host-guest mixture, the protons of the guest shifted upfield, while the protons of **TA4** becomes broadened and undergo downfield shift, suggesting the formation of the complex between **2-PF<sub>6</sub>** and **TA4**.

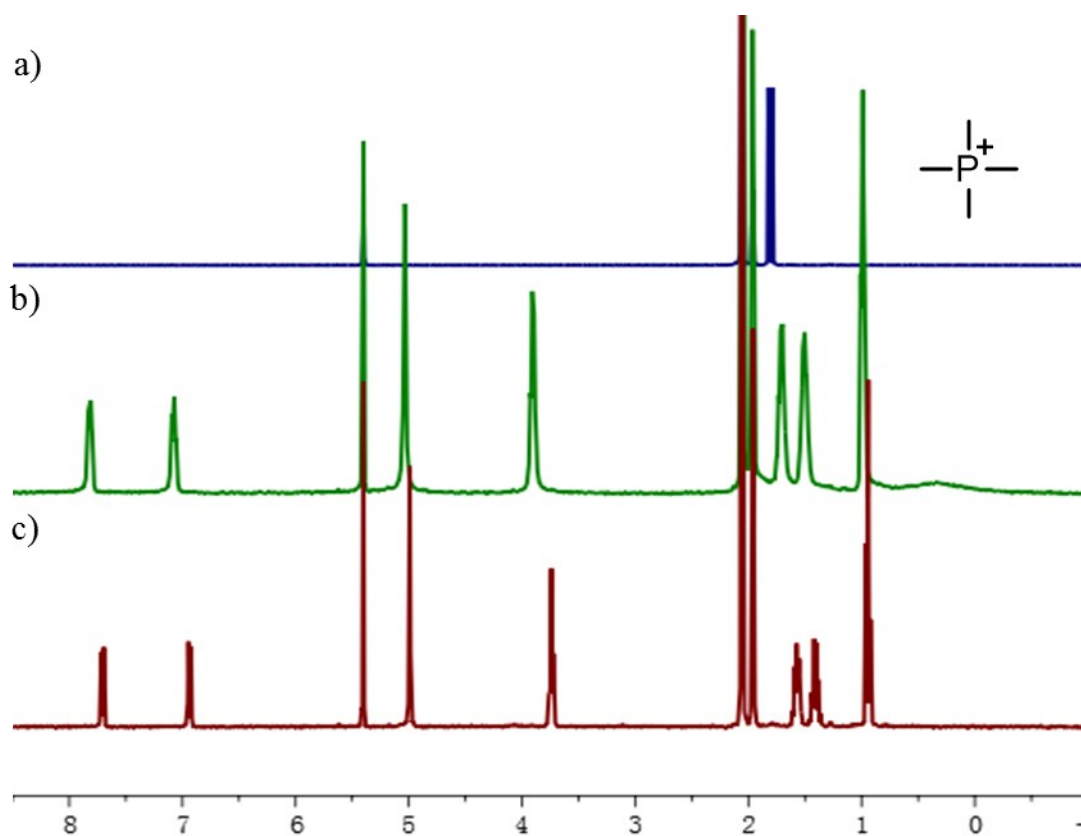

**Fig. S3** <sup>1</sup>H NMR spectra (400 MHz, CD<sub>2</sub>Cl<sub>2</sub>:CD<sub>3</sub>CN=1:1, 2.0 mM, 298 K) of (a) Guest **3-PF<sub>6</sub>**, (c) **TA4** and (b) their equimolar mixture. In the host-guest mixture, the protons of the guest became broadened and rolled into the baseline, while the protons of **TA4** shifted downfield, suggesting the complexation between **3-PF<sub>6</sub>** and **TA4**.

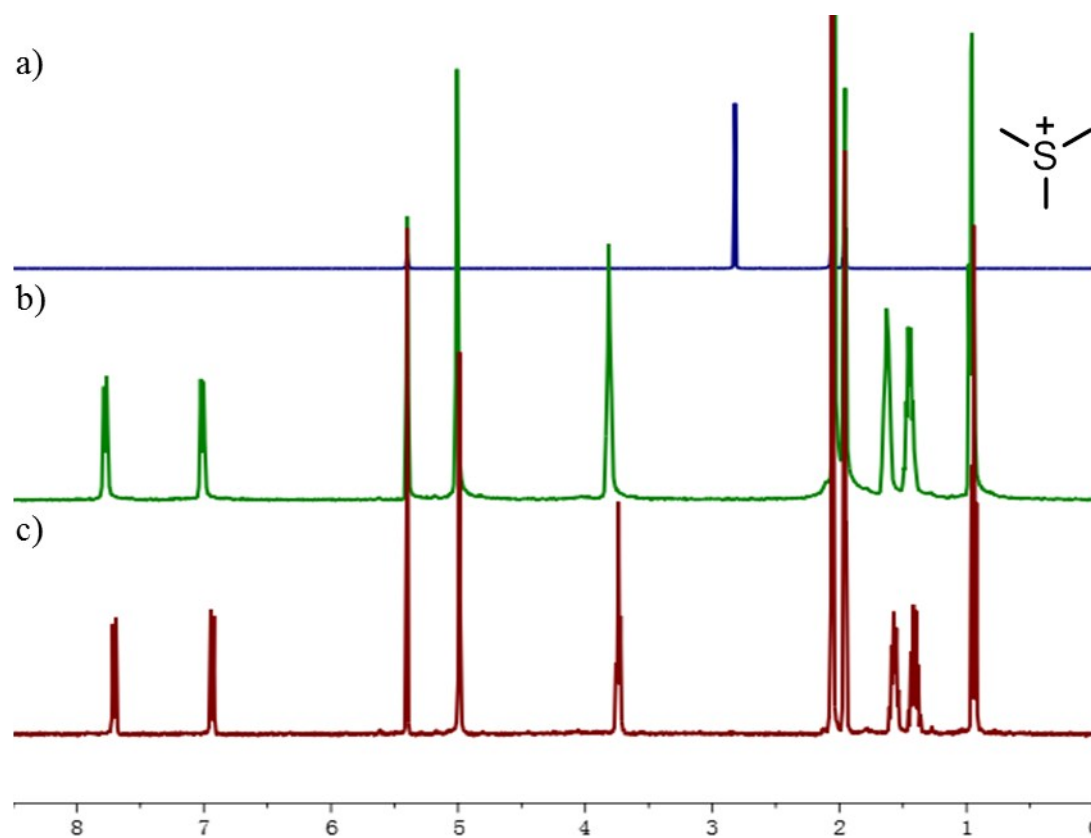

**Fig. S4**  $^1\text{H}$  NMR spectra (400 MHz,  $\text{CD}_2\text{Cl}_2:\text{CD}_3\text{CN}=1:1$ , 2.0 mM, 298 K) of (a) Guest **4-PF<sub>6</sub>**, (c) **TA4** and (b) their equimolar mixture. The protons of the guest disappeared into the baseline, while all the protons of **TA4** shifted downfield, suggesting the complexation between **4-PF<sub>6</sub>** and **TA4**.

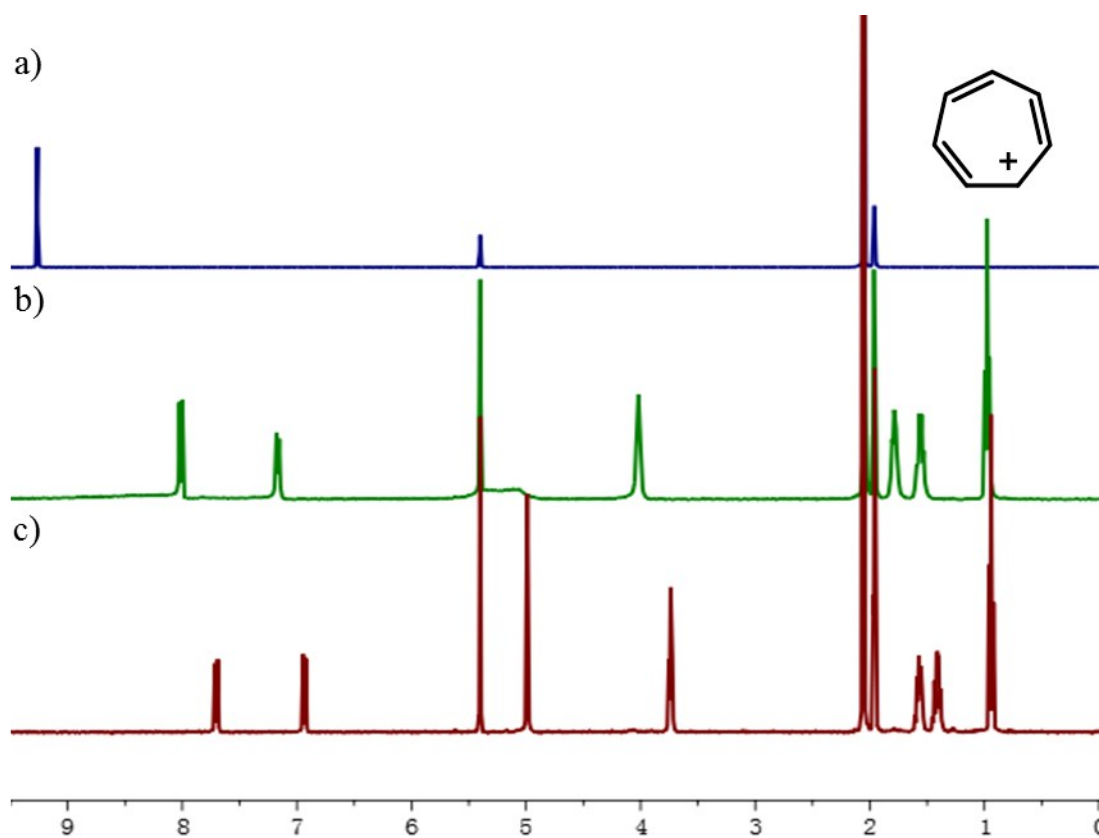

**Fig. S5** <sup>1</sup>H NMR spectra (400 MHz, CD<sub>2</sub>Cl<sub>2</sub>:CD<sub>3</sub>CN=1:1, 2.0 mM, 298 K) of (a) Guest **5-PF<sub>6</sub>**, (c) **TA4** and (b) their equimolar mixture. The protons of the guest disappeared into the baseline, while all the protons of **TA4** shifted downfield, indicating the complexation between **5-PF<sub>6</sub>** and **TA4**.

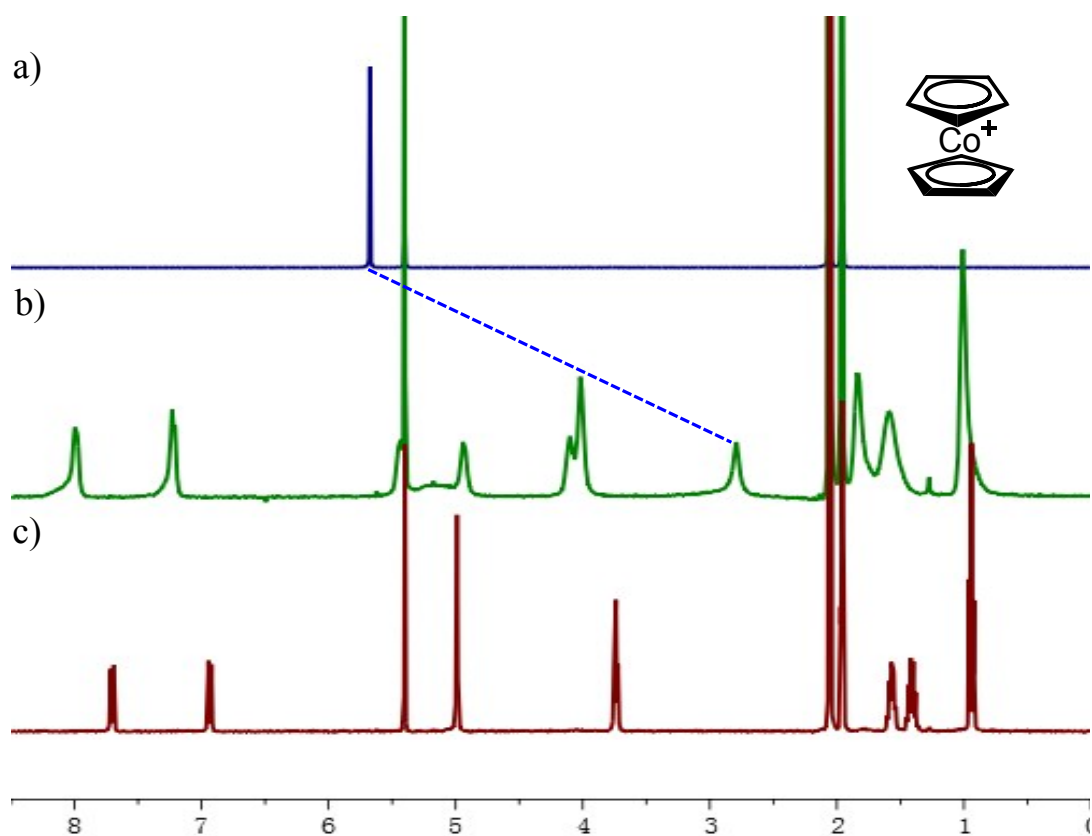

**Fig. S6**  $^1\text{H}$  NMR spectra (400 MHz,  $\text{CD}_2\text{Cl}_2:\text{CD}_3\text{CN}=1:1$ , 2.0 mM, 298 K) of (a) Guest **6-PF<sub>6</sub>**, (c) **TA4** and (b) their equimolar mixture. The protons of the guest shifted upfield, while all the protons of **TA4** became broadened and shifted downfield, suggesting the complexation between **6-PF<sub>6</sub>** and **TA4**.



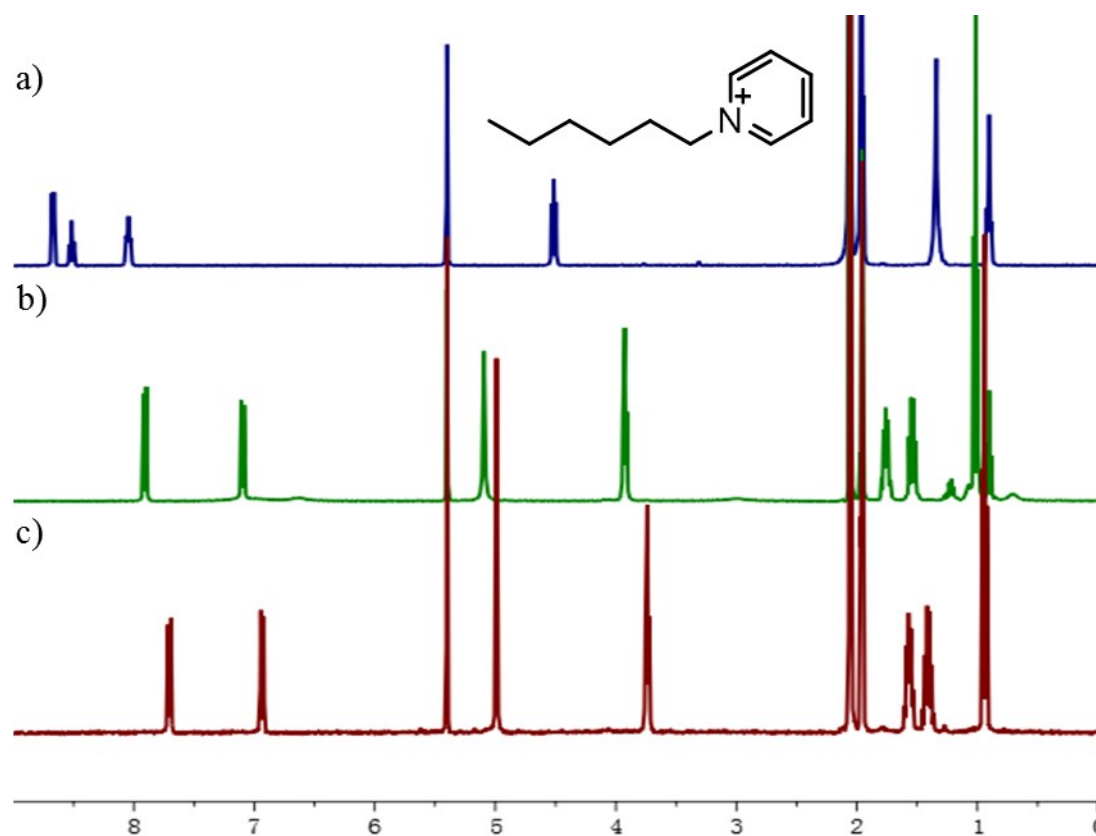

**Fig. S7** <sup>1</sup>H NMR spectra (400 MHz, CD<sub>2</sub>Cl<sub>2</sub>:CD<sub>3</sub>CN=1:1, 2.0 mM, 298 K) of (a) Guest **7-PF<sub>6</sub>**, (c) **TA4** and (b) their equimolar mixture. The protons of the guest became significantly broadened and rolled into the baseline, while all the protons of **TA4** shifted downfield, suggesting the complexation between **7-PF<sub>6</sub>** and **TA4**.

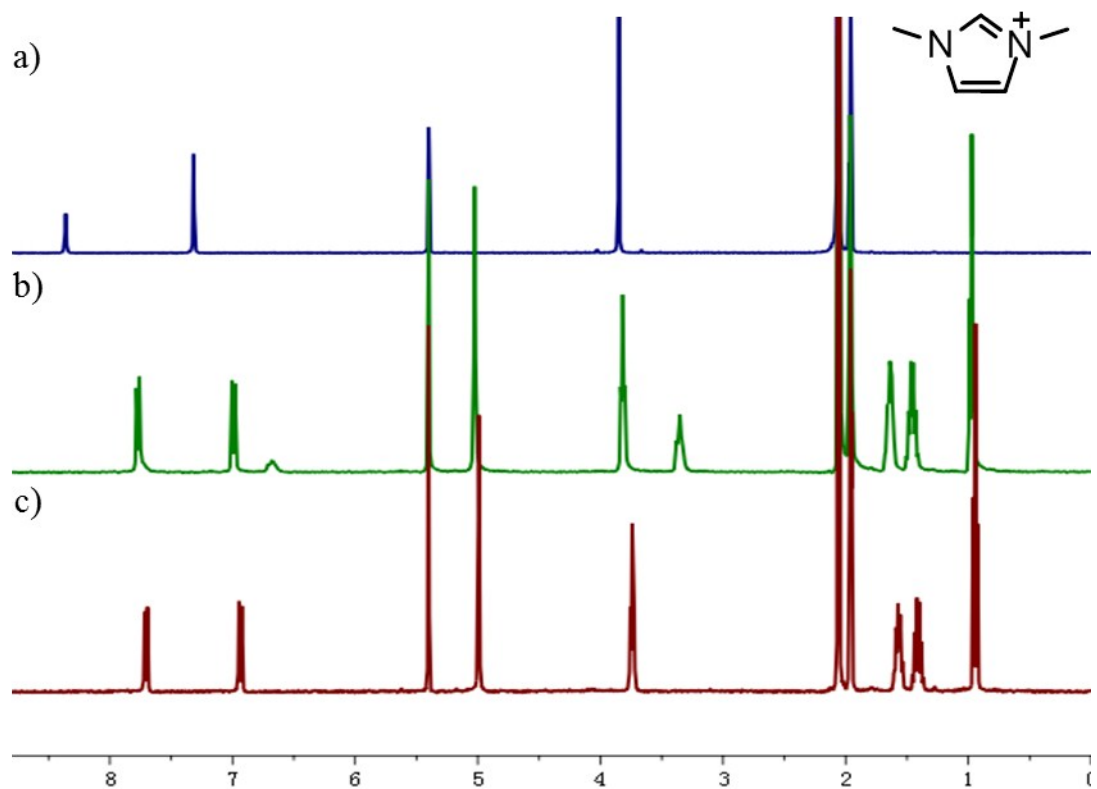

**Fig. S8**  $^1\text{H}$  NMR spectra (400 MHz,  $\text{CD}_2\text{Cl}_2:\text{CD}_3\text{CN}=1:1$ , 2.0 mM, 298 K) of (a) Guest **8-PF<sub>6</sub>**, (c) **TA4** and (b) their equimolar mixture. The protons of the guest became significantly broadened and rolled into the baseline, while the protons of **TA4** shifted downfield, suggesting the complexation between **8-PF<sub>6</sub>** and **TA4**.

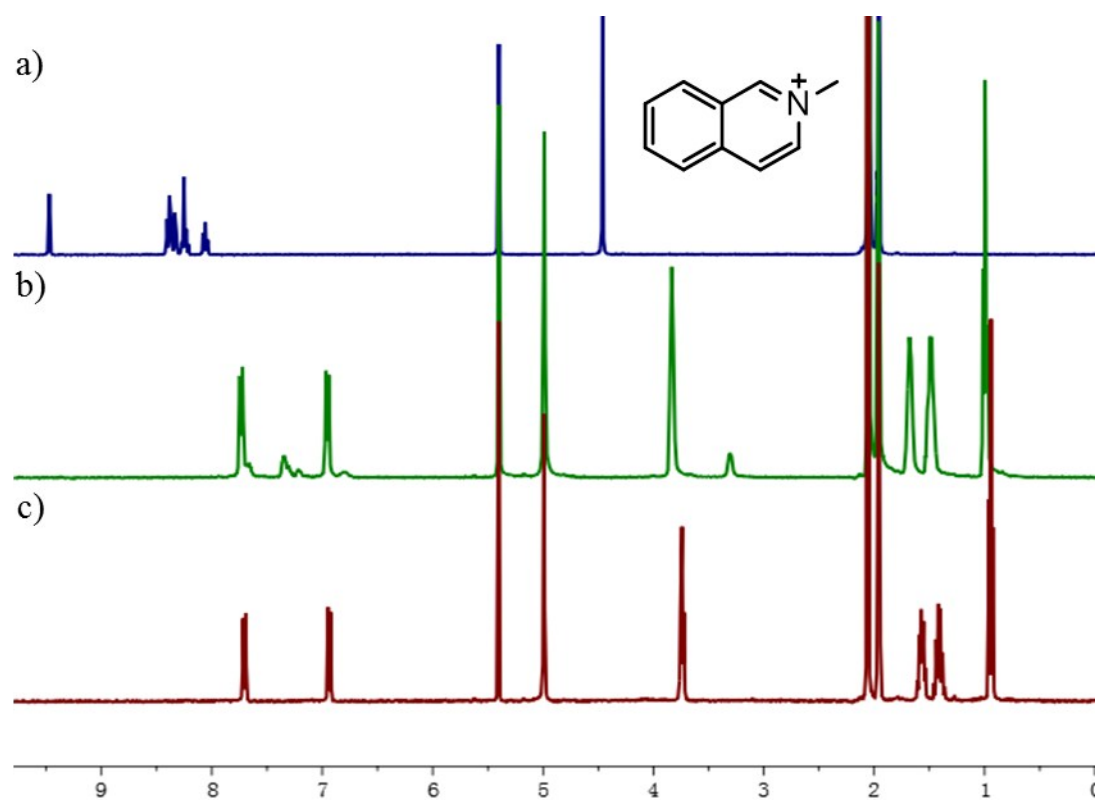

**Fig. S9** <sup>1</sup>H NMR spectra (400 MHz, CD<sub>2</sub>Cl<sub>2</sub>:CD<sub>3</sub>CN=1:1, 2.0 mM, 298 K) of (a) Guest **9-PF<sub>6</sub>**, (c) **TA4** and (b) their equimolar mixture. The protons of the guest shifted upfield and became broadened, while the protons of **TA4** shifted downfield, suggesting the complexation between **9-PF<sub>6</sub>** and **TA4**.

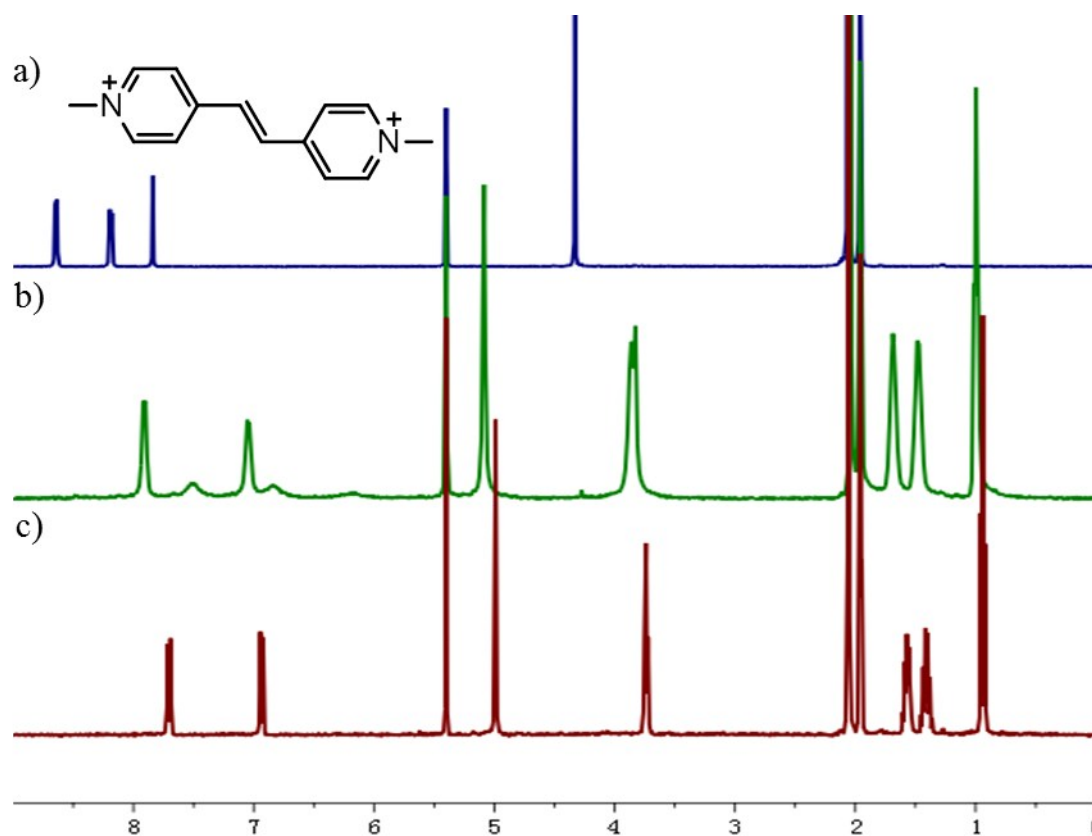

**Fig. S10**  $^1\text{H}$  NMR spectra (400 MHz,  $\text{CD}_2\text{Cl}_2:\text{CD}_3\text{CN}=1:1$ , 2.0 mM, 298 K) of (a) Guest **10-2PF<sub>6</sub>**, (c) **TA4** and (b) their equimolar mixture. The protons of guest shifted upfield and became broadened, while all the protons of **TA4** shifted downfield, suggesting the complexation between **10-2PF<sub>6</sub>** and **TA4**.

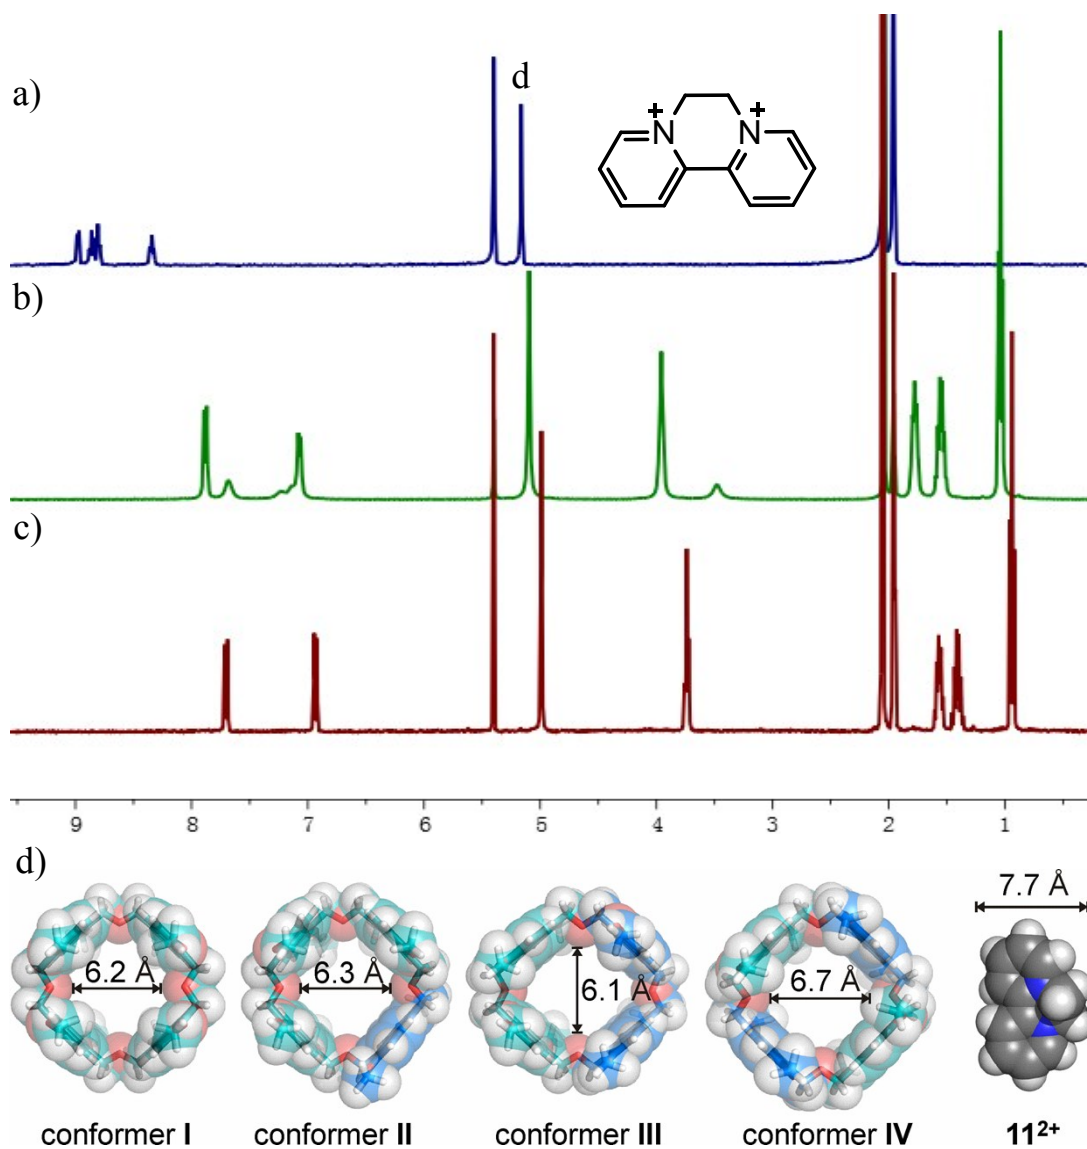

**Fig. S11**  $^1\text{H}$  NMR spectra (400 MHz,  $\text{CD}_2\text{Cl}_2:\text{CD}_3\text{CN}=1:1$ , 2.0 mM, 298 K) of (a) Guest **11-2PF<sub>6</sub>**, (c) **TA4** (b) their equimolar mixture. The protons of the guest shifted upfield and became broadened, while all the protons of **TA4** shifted downfield, suggesting the complexation between **11-2PF<sub>6</sub>** and **TA4**. (d) molecular models to show the cavity size of four conformers and the size of guest **11-2PF<sub>6</sub>**. In view of the NMR result and molecular model, guest **11-2PF<sub>6</sub>** may be shallowly encapsulated in the cavity of **TA4**.

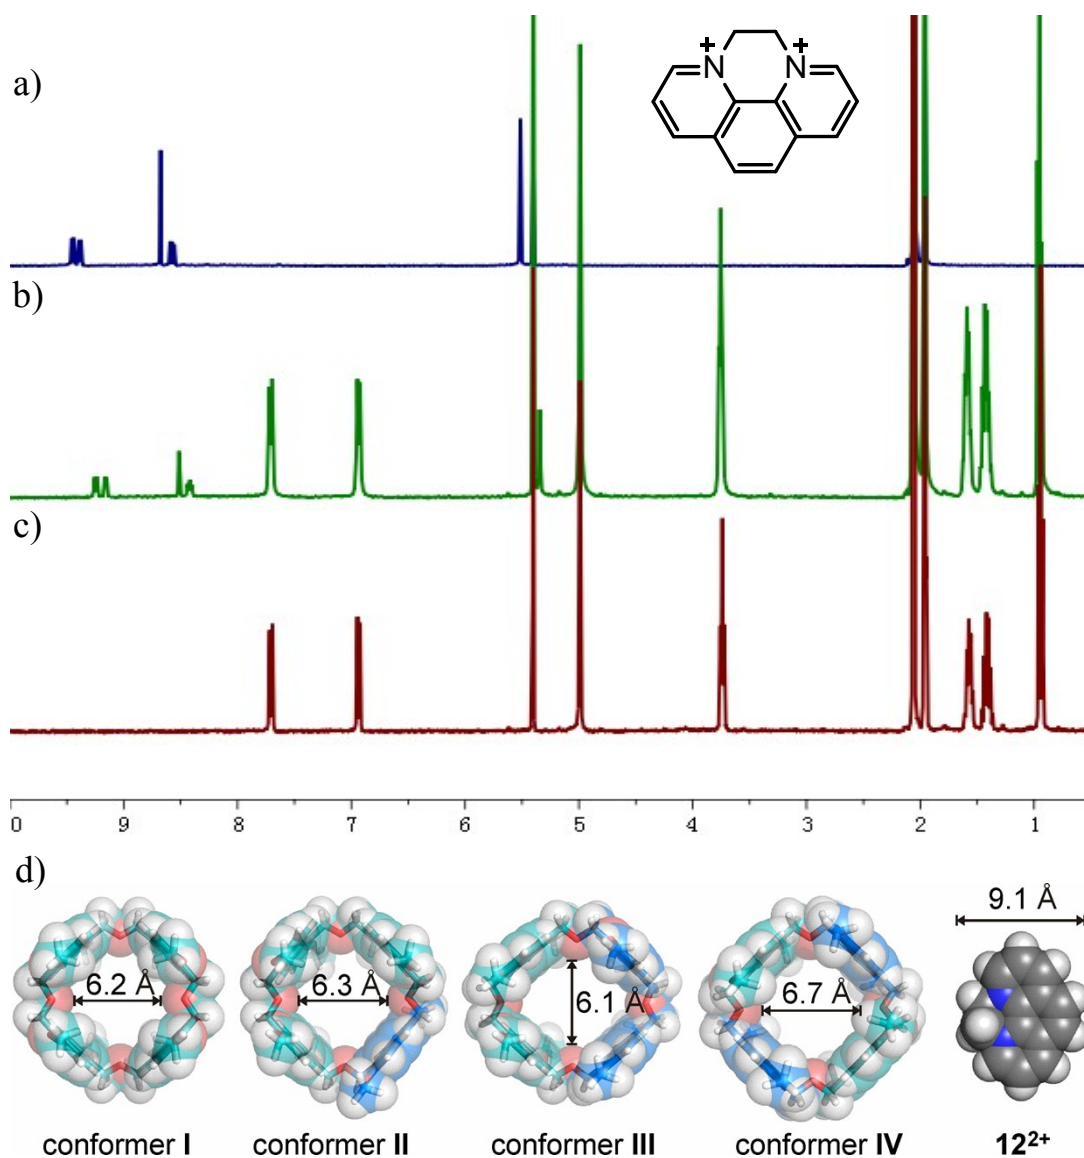

**Fig. S12**  $^1\text{H}$  NMR spectra (400 MHz,  $\text{CD}_2\text{Cl}_2:\text{CD}_3\text{CN}=1:1$ , 2.0 mM, 298 K) of (a) Guest **12-2PF<sub>6</sub>**, (c) **TA4** and (b) their equimolar mixture. The protons of the guest shifted upfield, and the protons of **TA4** did not move, suggesting that **TA4** cannot complex with **12-2PF<sub>6</sub>**. The guest probably sits at the entrance of **TA4**; (d) molecular models to show the cavity size of four conformers and the size of guest **12-2PF<sub>6</sub>**. Obviously, guest **12-2PF<sub>6</sub>** is too large to even fit the largest cavity (conformer **IV**). The observed downfield shift of the guests' protons may result from the interactions of **12-2PF<sub>6</sub>** with the outside surface of **TA4**.

### 3. Mass spectra of the Complexes

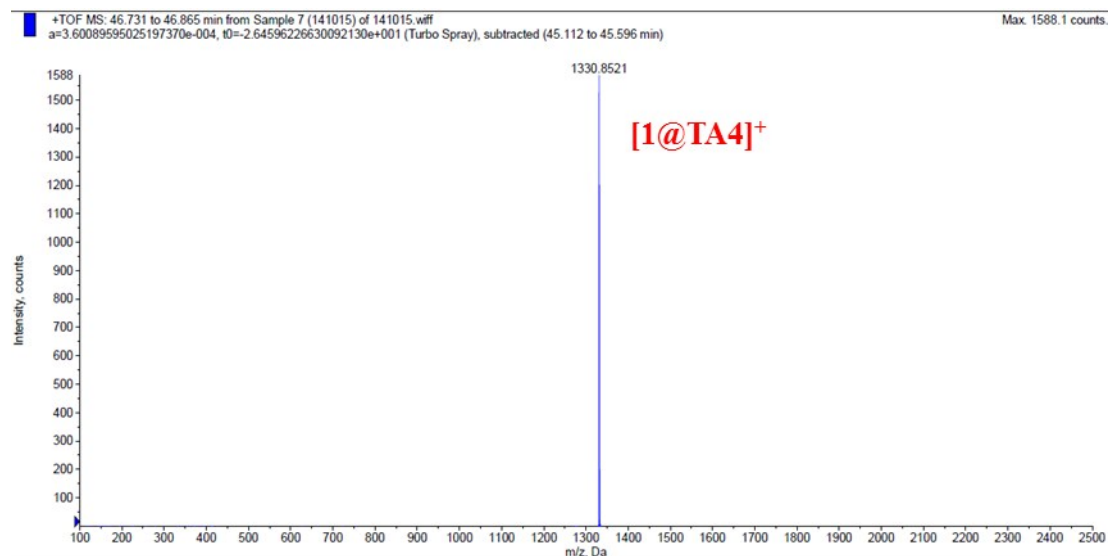

**Fig. S13** ESI mass spectrum of **1-PF<sub>6</sub>@TA4**. The result indicates **1-PF<sub>6</sub>** and **TA4** form a 1:1 complex.

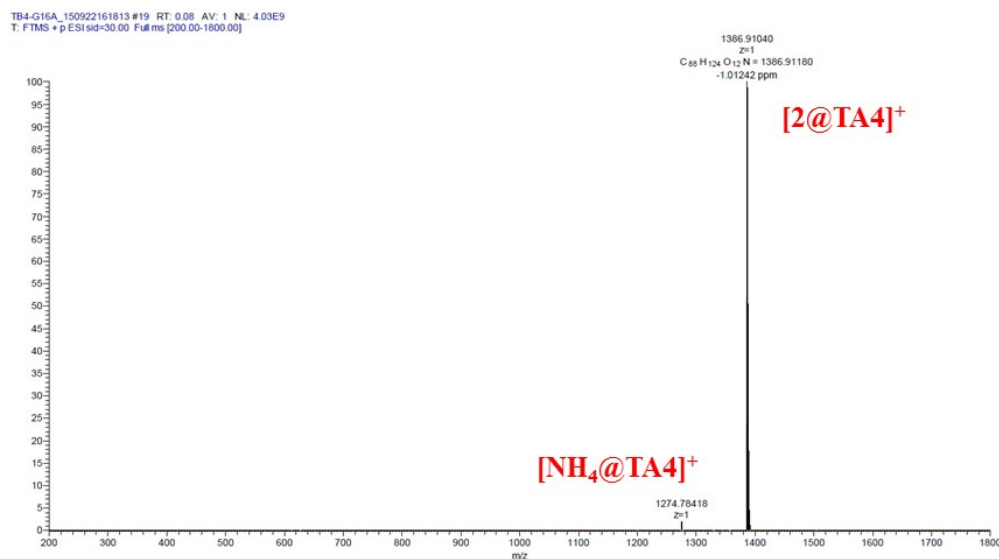

**Fig. S14** ESI mass spectrum of **2-PF<sub>6</sub>@TA4**. The result indicates **2-PF<sub>6</sub>** and **TA4** form a 1:1 complex.

TB4-G90 #18 RT: 0.08 AV: 1 NL: 5.12E9  
T: FTMS + p ESI: sid=30.00 Full ms [200.00-1800.00]

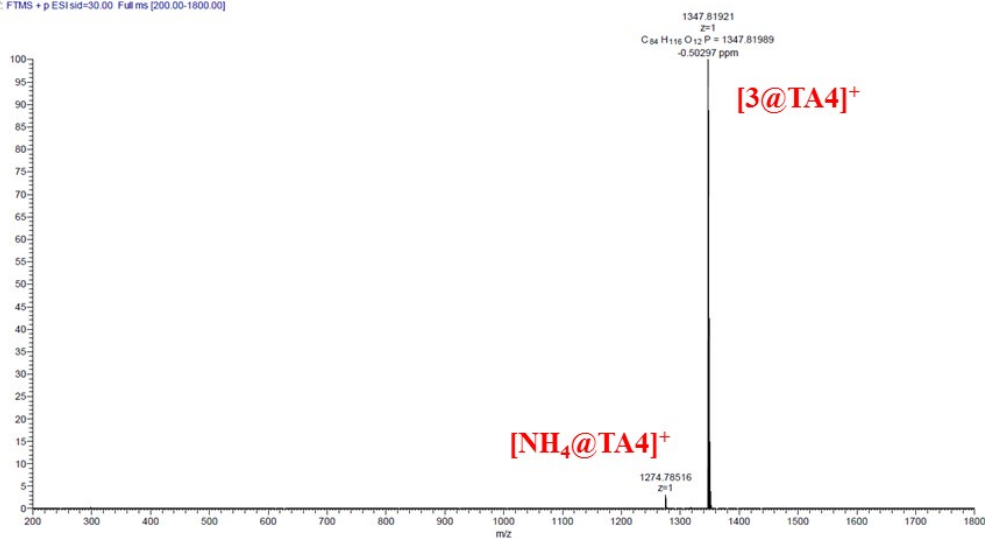

**Fig. S15** ESI mass spectrum of 3-PF<sub>6</sub>@TA4. The result indicates 3-PF<sub>6</sub> and TA4 form a 1:1 complex.

TB4-G109C #20 RT: 0.09 AV: 1 NL: 3.08E9  
T: FTMS + p ESI: sid=30.00 Full ms [200.00-1800.00]

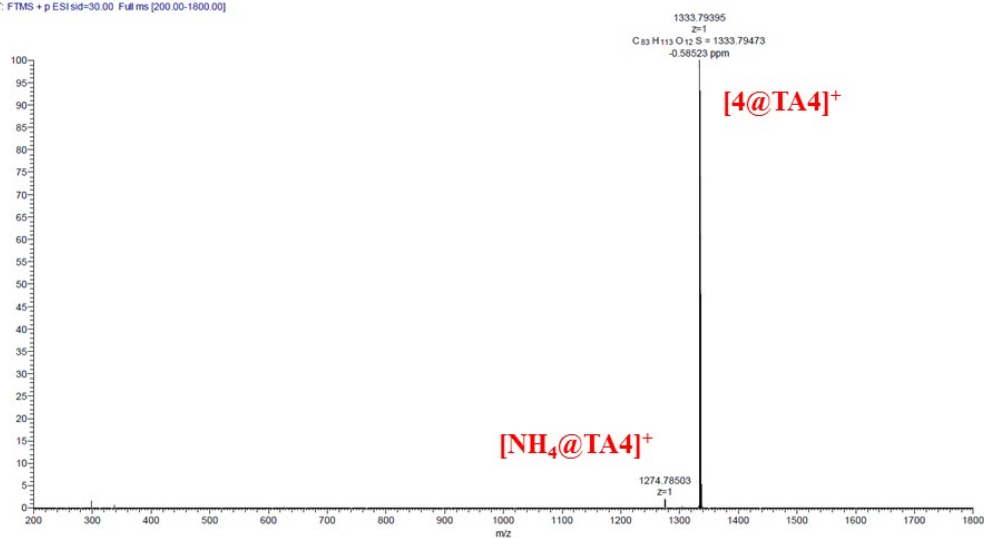

**Fig. S16** ESI mass spectrum of 4-PF<sub>6</sub>@TA4. The result indicates 4-PF<sub>6</sub> and TA4 form a 1:1 complex.



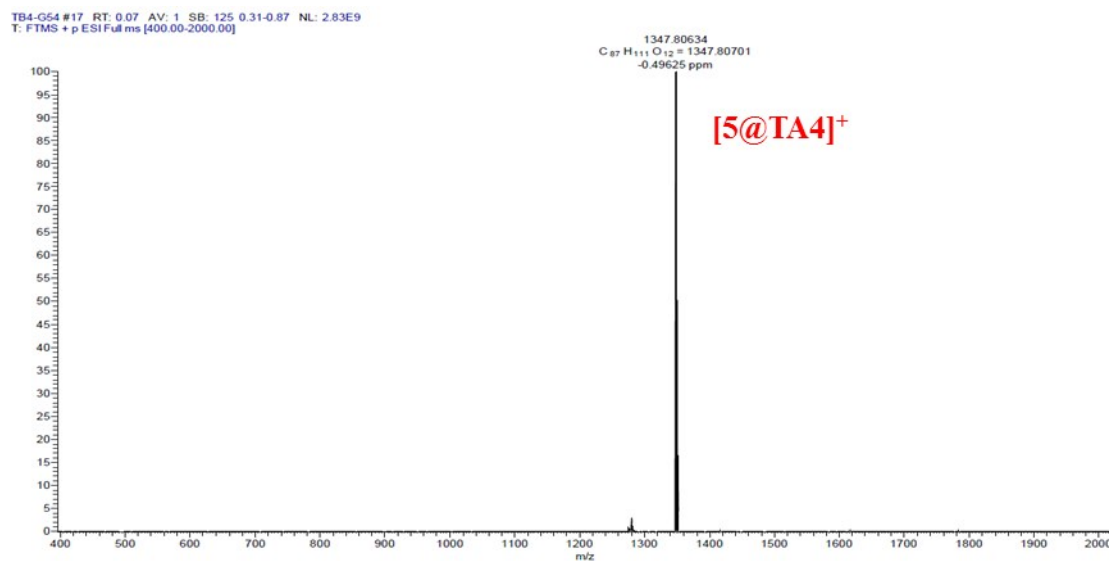

**Fig. S17** ESI mass spectrum of **5-PF<sub>6</sub>@TA4**. The result indicates **5-PF<sub>6</sub>** and **TA4** form a 1:1 complex.

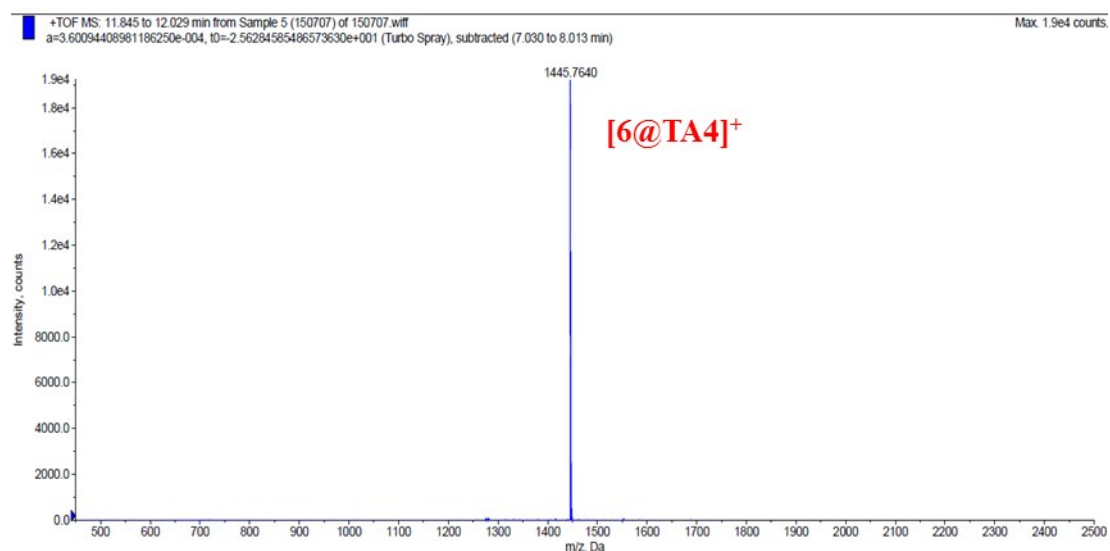

**Fig. S18** ESI mass spectrum of **6-PF<sub>6</sub>@TA4**. The result indicates **6-PF<sub>6</sub>** and **TA4** form a 1:1 complex.

TB4-P6 #13 RT: 0.06 AV: 1 NL: 3.17E9  
T: FTMS + p ESI: sid=30.00 Full ms [200.00-1800.00]

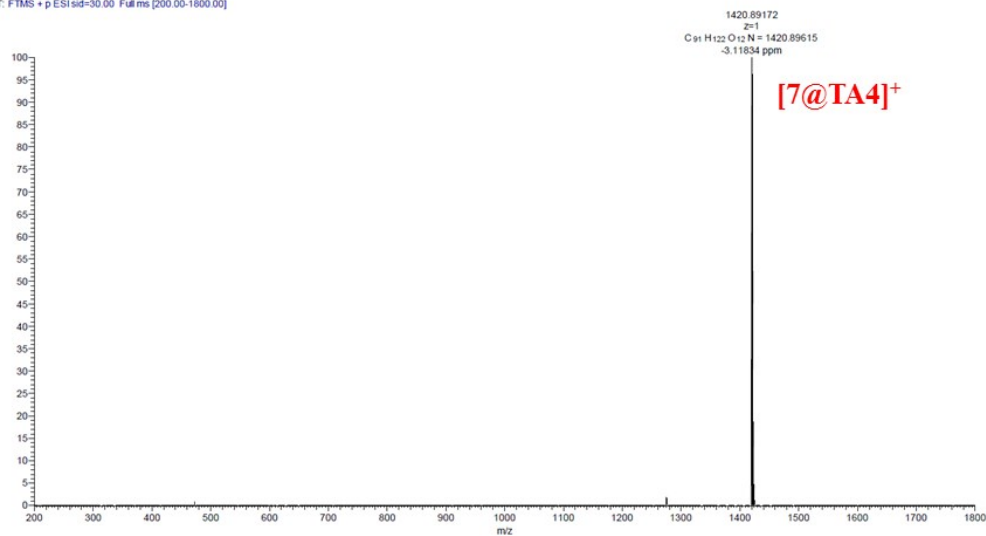

**Fig. S19** ESI mass spectrum of 7-PF<sub>6</sub>@TA4. The result indicates 7-PF<sub>6</sub> and TA4 form a 1:1 complex.

TB4-G8 #19 RT: 0.06 AV: 1 NL: 2.94E9  
T: FTMS + p ESI: sid=30.00 Full ms [200.00-1800.00]

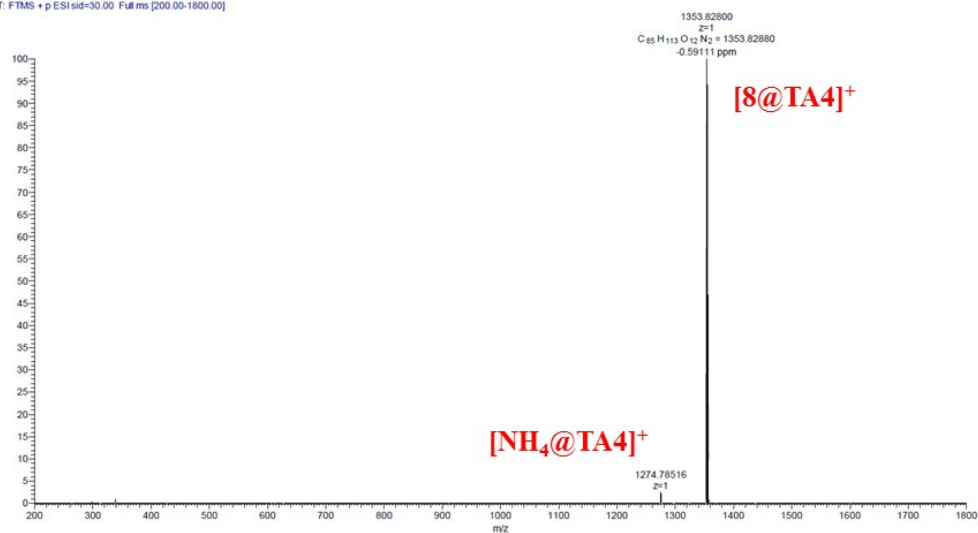

**Fig. S20** ESI mass spectrum of 8-PF<sub>6</sub>@TA4. The result indicates 8-PF<sub>6</sub> and TA4 form a 1:1 complex.

TB4-G91 #21 RT: 0.09 AV: 1 NL: 2.44E9  
T: FTMS + p ESI sid=30.00 Full ms [200.00-1800.00]

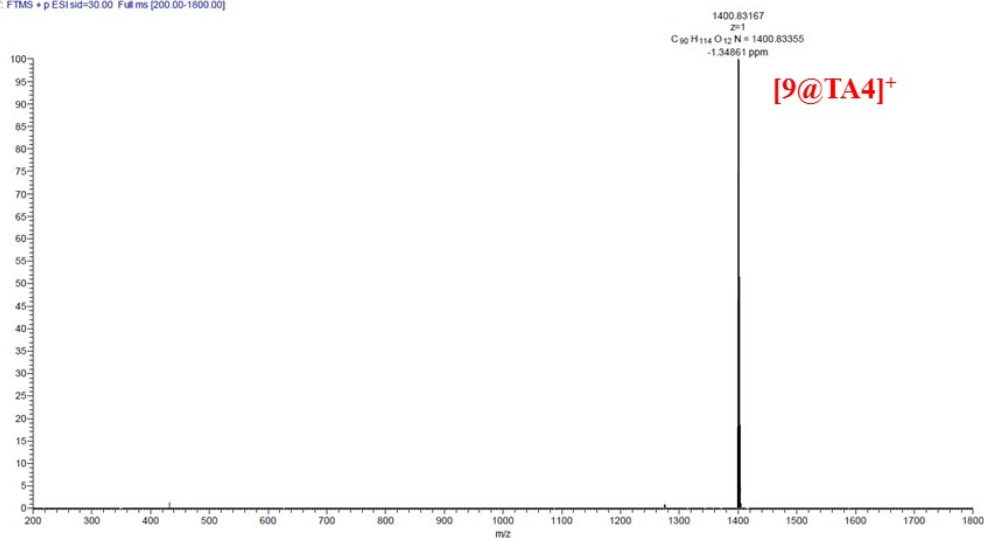

**Fig. S21** ESI mass spectrum of **9-PF<sub>6</sub>@TA4**. The result indicates **9-PF<sub>6</sub>** and **TA4** form a 1:1 complex.

TB4-G9B 150922165059 #28 RT: 0.12 AV: 1 NL: 8.00E8  
T: FTMS + p ESI sid=30.00 Full ms [200.00-1800.00]

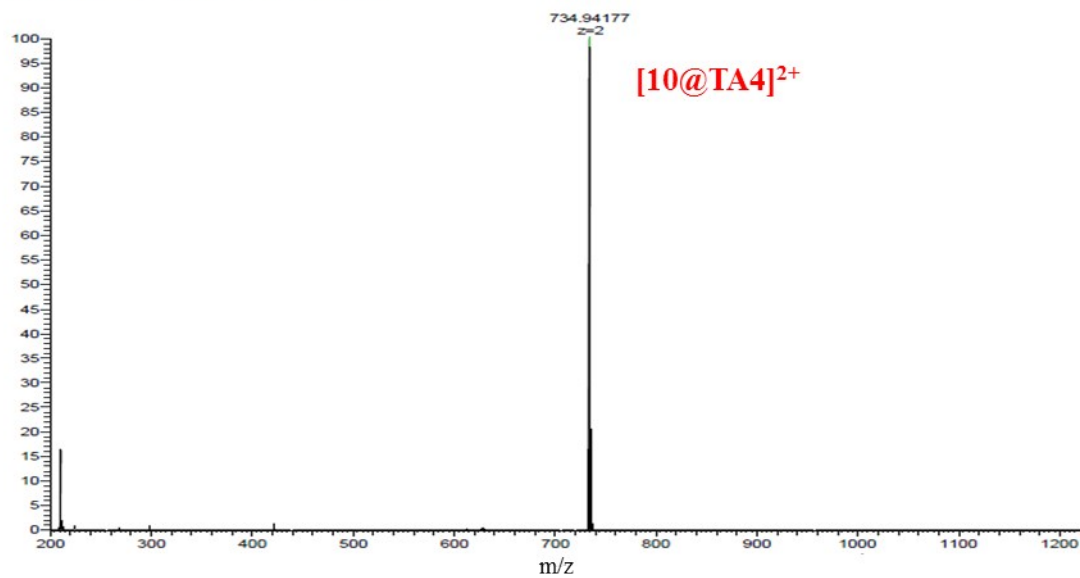

**Fig. S22** ESI mass spectrum of **10-2PF<sub>6</sub>@TA4**. The result indicates **10-2PF<sub>6</sub>** and **TA4** form a 1:1 complex.

TB4-G9 150723104333 #28 RT: 0.12 AV: 1 SB: 125 0.31-0.87 NL: 2.49E8  
T: FTMS + p ESI Full ms [400.00-2000.00]

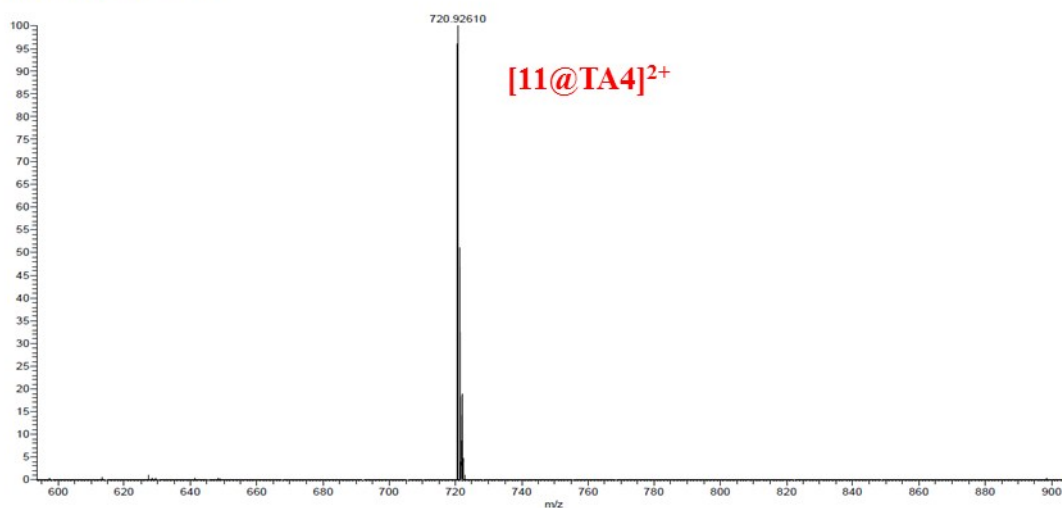

**Fig. S23** ESI mass spectrum of **11-2PF<sub>6</sub>@TA4**. The result indicates **11-2PF<sub>6</sub>** and **TA4** form a 1:1 complex.

## 4. Binding Constants Determined by ITC

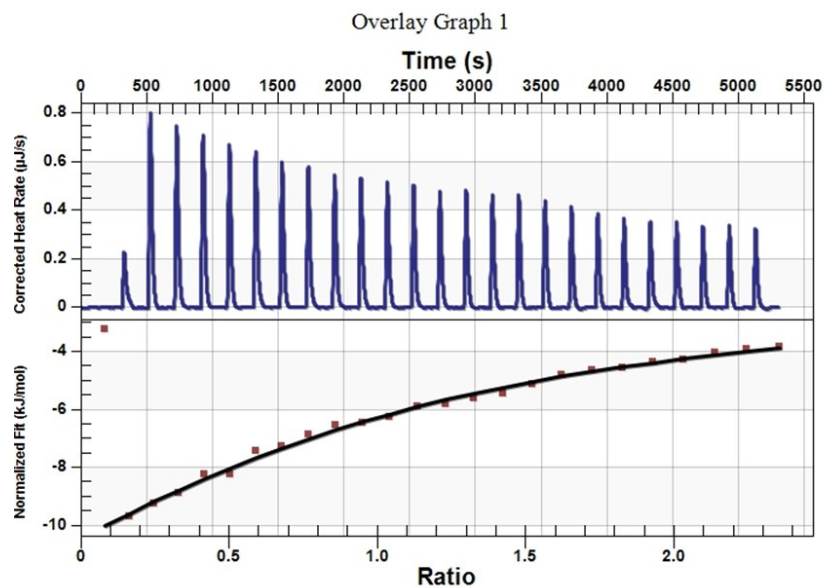

*Fig. S24* Titration plots (heat flow versus time and heat versus guest/host ratio) obtained from ITC experiments of TA4 with 1-PF<sub>6</sub> in the 1:1 mixture of 1,2-dichloroethane and CH<sub>3</sub>CN.

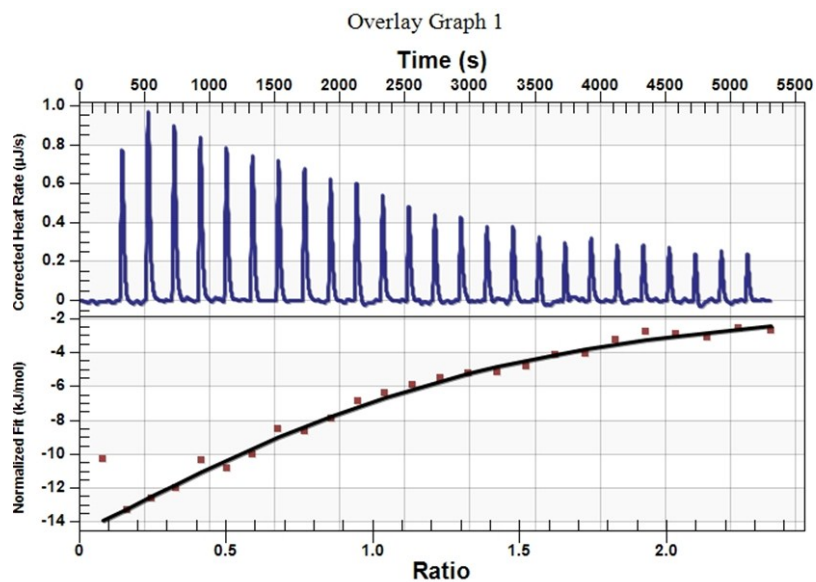

*Fig. S25* Titration plots (heat flow versus time and heat versus guest/host ratio) obtained from ITC experiments of TA4 with 2-PF<sub>6</sub> in the 1:1 mixture of 1,2-dichloroethane and CH<sub>3</sub>CN.

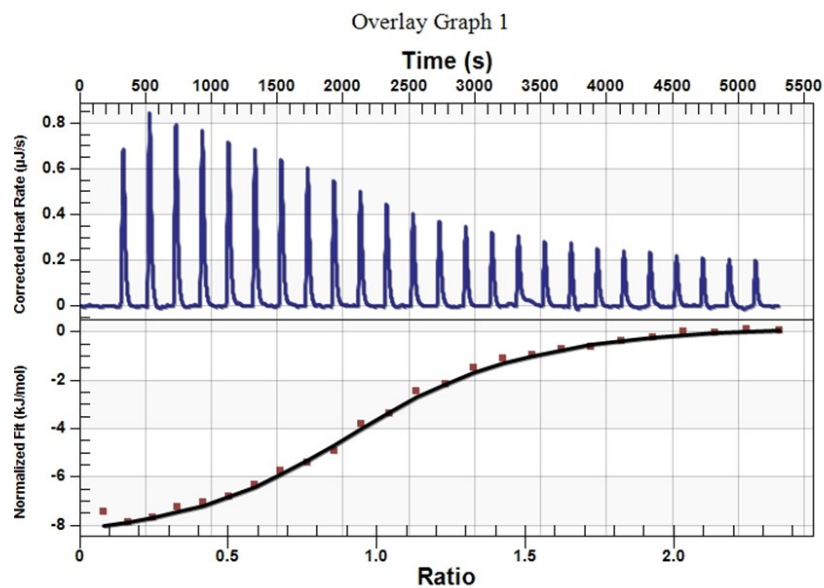

**Fig. S26** Titration plots (heat flow versus time and heat versus guest/host ratio) obtained from ITC experiments of **TA4** with **5-PF<sub>6</sub>** in the 1:1 mixture of 1,2-dichloroethane and  $\text{CH}_3\text{CN}$ .

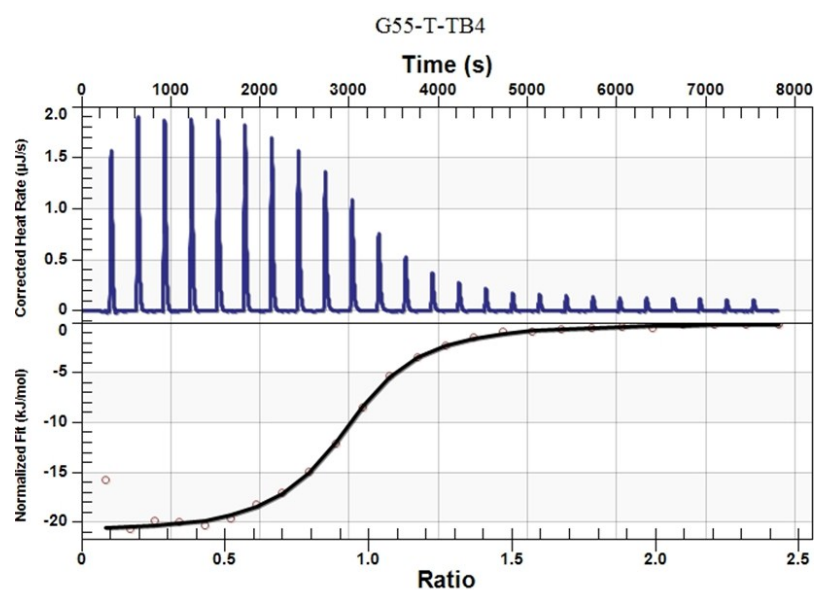

**Fig. S27** Titration plots (heat flow versus time and heat versus guest/host ratio) obtained from ITC experiments of **TA4** with **6-PF<sub>6</sub>** in the 1:1 mixture of 1,2-dichloroethane and  $\text{CH}_3\text{CN}$ .

## 5. Binding Constants Determined by Titration

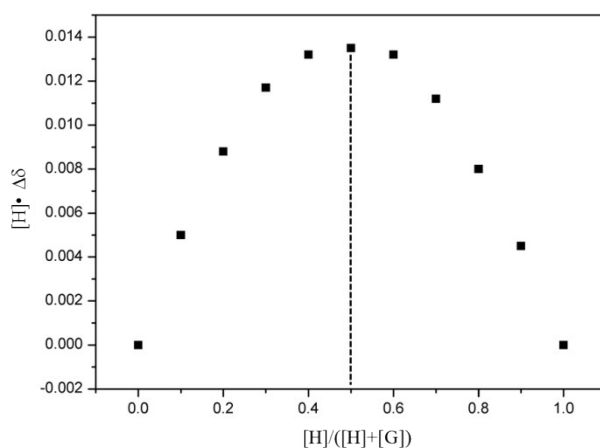

**Fig. S28** Job's plot obtained by plotting the chemical shift change ( $\Delta\delta$ ) of the Host's proton ( $a+b$ ) in  $^1\text{H}$  NMR spectra by varying the ratio of the host and the guest against the mole fraction of **TA4**. The total concentration of the host and the guest is fixed:  $[\text{Host}] + [\text{Guest}] = 2.0 \text{ mM}$ . This experiment supports the 1:1 binding stoichiometry between **3-PF<sub>6</sub>** and **TA4** in the 1:1 mixture of  $\text{CD}_2\text{Cl}_2$  and  $\text{CD}_3\text{CN}$ .

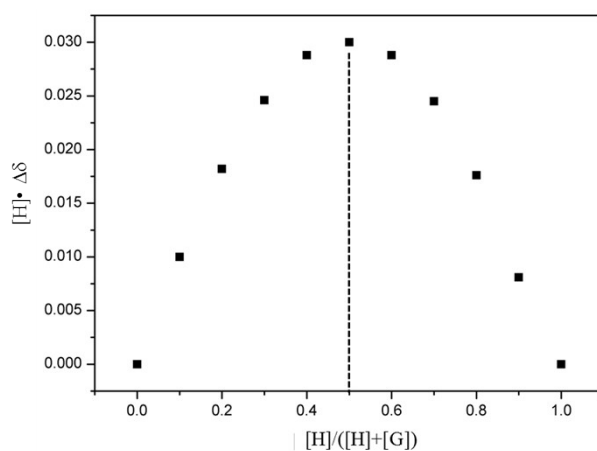

**Fig. S29** Job's plot obtained by plotting the chemical shift change ( $\Delta\delta$ ) of the Host's proton  $c$  in  $^1\text{H}$  NMR spectra by varying the ratio of the host and the guest against the mole fraction of Host **TA4**. The total concentration of the host and the guest is fixed:  $[\text{Host}] + [\text{Guest}] = 2.0 \text{ mM}$ . This experiment supports the 1:1 binding stoichiometry between **9-PF<sub>6</sub>** and **TA4** in the 1:1 mixture of  $\text{CD}_2\text{Cl}_2$  and  $\text{CD}_3\text{CN}$ .

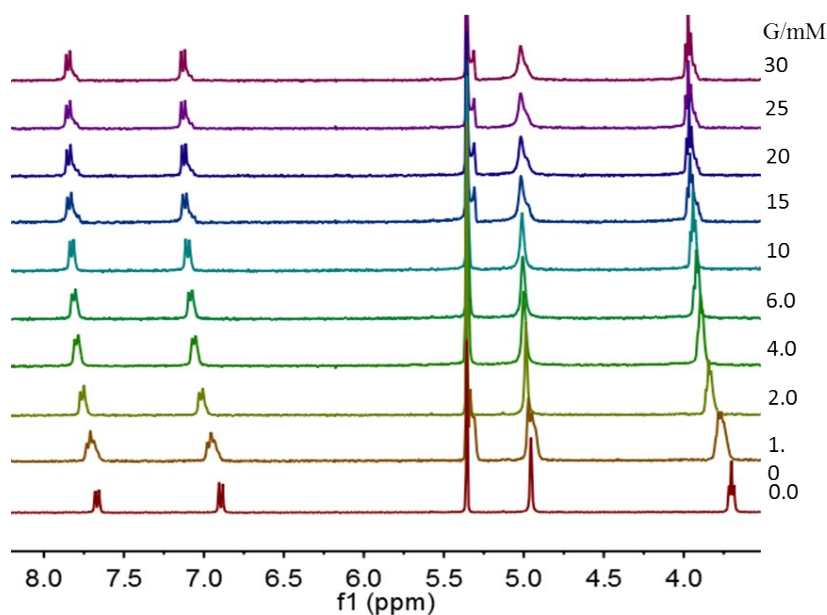

**Fig. S30** Partial  $^1\text{H}$  NMR spectra (400 MHz,  $\text{CD}_2\text{Cl}_2:\text{CD}_3\text{CN}=1:1$ , 298 K) of **TA4** (0.5 mM) titrated by **3-PF<sub>6</sub>**. From bottom to top, the concentrations of **3-PF<sub>6</sub>** are in the range of 0~30.0 mM. Protons (*a+b*) of **TA4** were monitored for the calculation of binding constants. This is the same for all the following experiments, unless otherwise noted. Nonlinear curve-fitting method<sup>2</sup> used here has been reported.

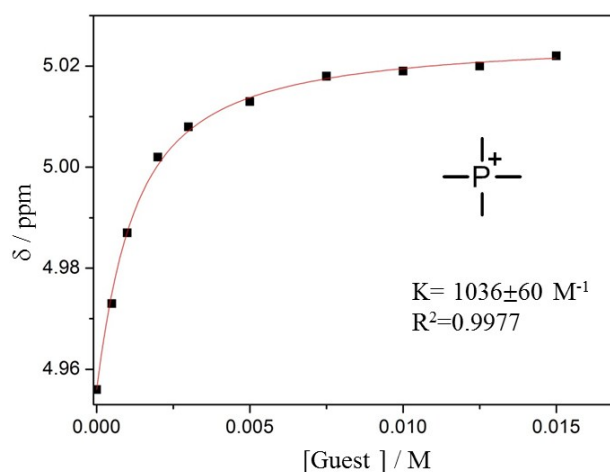

**Fig. S31** Non-linear curve-fitting for the complexation between **TA4** and **3-PF<sub>6</sub>** in the 1:1 mixture of  $\text{CD}_2\text{Cl}_2$  and  $\text{CD}_3\text{CN}$  at 298 K.

<sup>2</sup> G. Huang, Z. He, C.-X. Cai, F. Pan, D. Yang, K. Rissanen and W. Jiang. *Chem. Commun.* 2015, **51**, 15490-15493



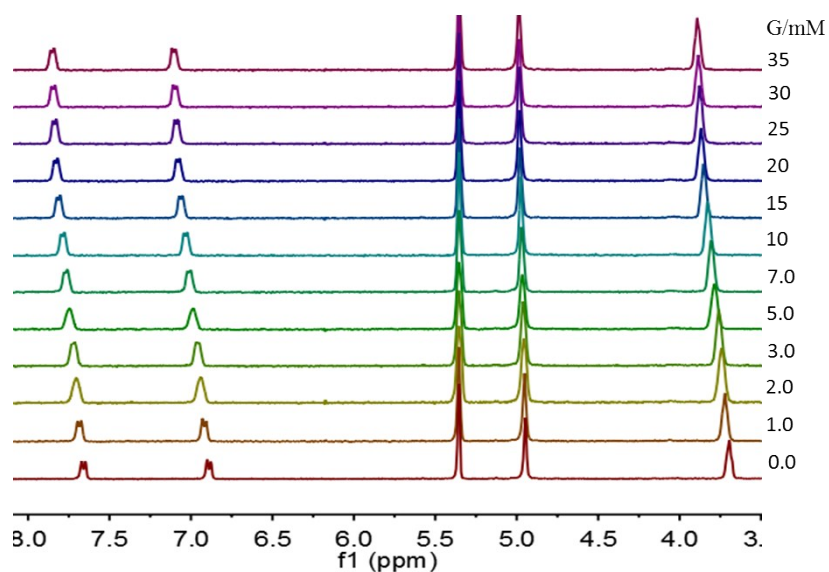

**Fig. S32** Partial  $^1\text{H}$  NMR spectra (400 MHz,  $\text{CD}_2\text{Cl}_2:\text{CD}_3\text{CN}=1:1$ , 298 K) of **TA4** (0.5 mM) titrated by **4-PF<sub>6</sub>**. From bottom to top, the concentrations of **4-PF<sub>6</sub>** are in the range of 0~35.0 mM.

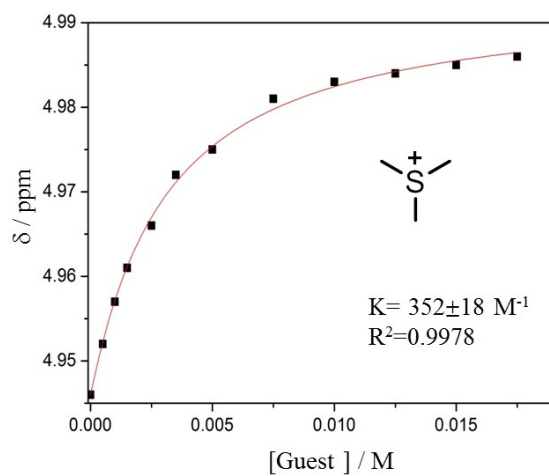

**Fig. S33** Non-linear curve-fitting for the complexation between **TA4** and **4-PF<sub>6</sub>** in the 1:1 mixture of  $\text{CD}_2\text{Cl}_2$  and  $\text{CD}_3\text{CN}$  at 298 K.

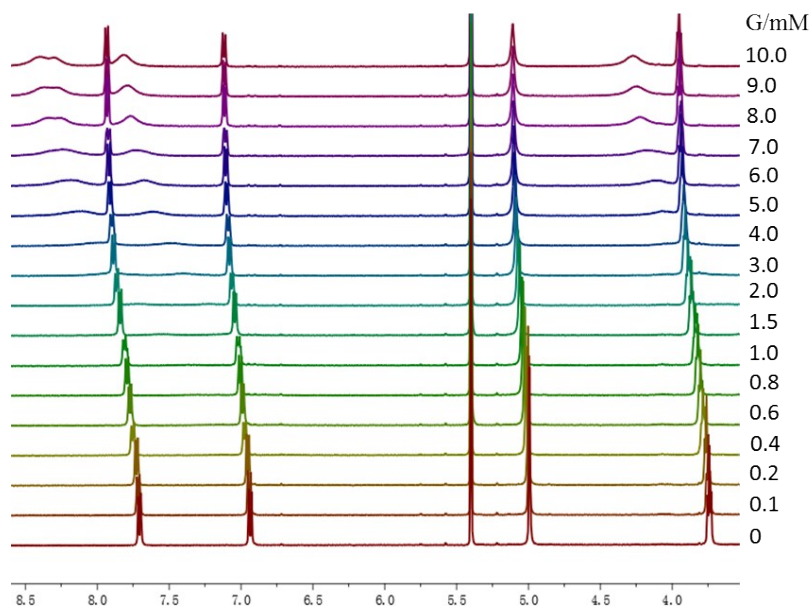

**Fig. S34** Partial  $^1\text{H}$  NMR spectra (400 MHz,  $\text{CD}_2\text{Cl}_2:\text{CD}_3\text{CN}=1:1$ , 298 K) of **TA4** (0.5 mM) titrated by **7-PF<sub>6</sub>**. From bottom to top, the concentrations of **7-PF<sub>6</sub>** are in the range of 0~10.0 mM.

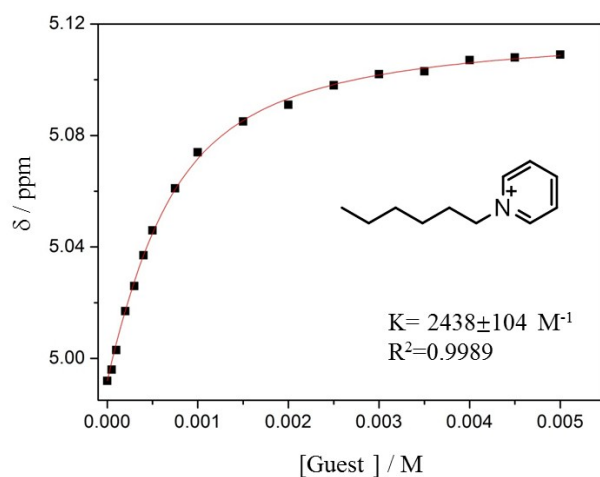

**Fig. S35** Non-linear curve-fitting for the complexation between **TA4** and **7-PF<sub>6</sub>** in the 1:1 mixture of  $\text{CD}_2\text{Cl}_2$  and  $\text{CD}_3\text{CN}$  at 298 K.

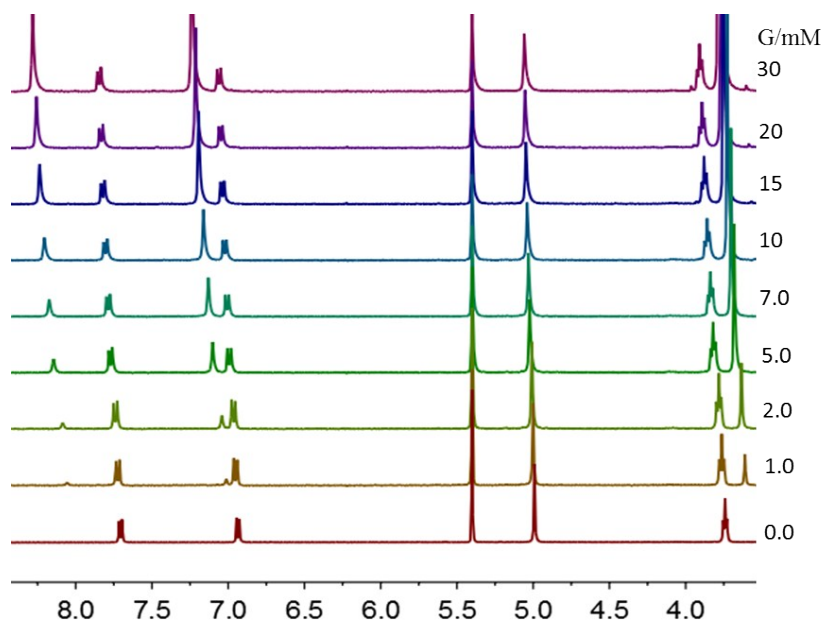

**Fig. S36** Partial  $^1\text{H}$  NMR spectra (400 MHz,  $\text{CD}_2\text{Cl}_2:\text{CD}_3\text{CN}=1:1$ , 298 K) of **TA4** (0.5 mM) titrated by **8-PF<sub>6</sub>**. From bottom to top, the concentrations of **8-PF<sub>6</sub>** are in the range of 0~30.0 mM.

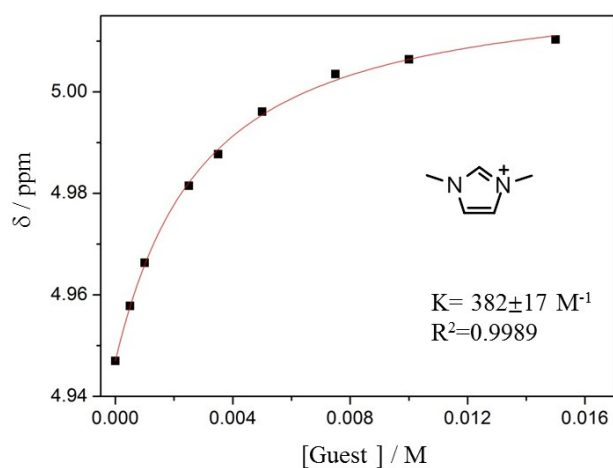

**Fig. S37** Non-linear curve-fitting for the complexation between **TA4** and **8-PF<sub>6</sub>** in the 1:1 mixture of  $\text{CD}_2\text{Cl}_2$  and  $\text{CD}_3\text{CN}$  at 298 K.

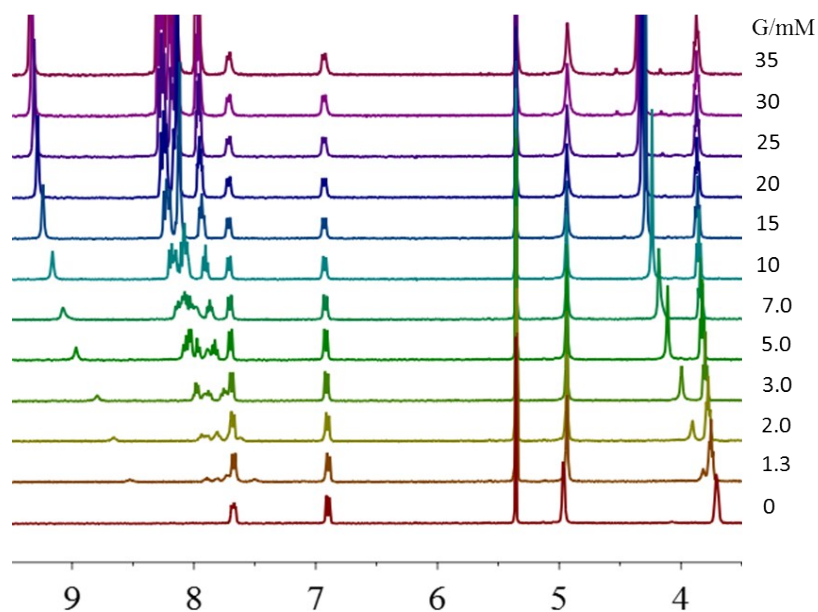

**Fig. S38** Partial  $^1\text{H}$  NMR spectra (400 MHz,  $\text{CD}_2\text{Cl}_2:\text{CD}_3\text{CN}=1:1$ , 298 K) of **TA4** (0.5 mM) titrated by **9-PF<sub>6</sub>**. From bottom to top, the concentrations of **9-PF<sub>6</sub>** are in the range of 0~35.0 mM. The chemical shifts of proton *c* of **TA4** were monitored for the calculation of binding constants.

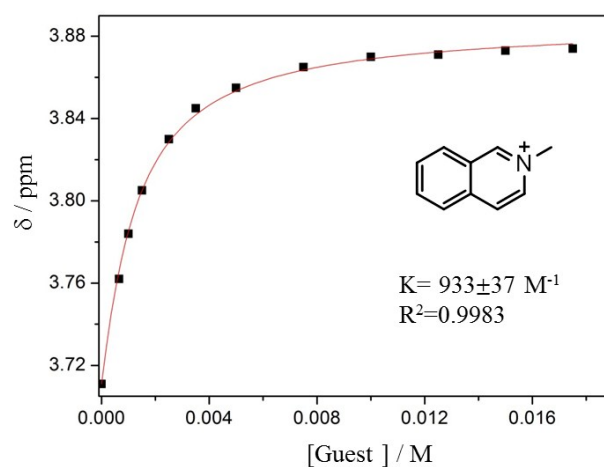

**Fig. S39** Non-linear curve-fitting for the complexation between **TA4** and **9-PF<sub>6</sub>** in the 1:1 mixture of  $\text{CD}_2\text{Cl}_2$  and  $\text{CD}_3\text{CN}$  at 298 K.

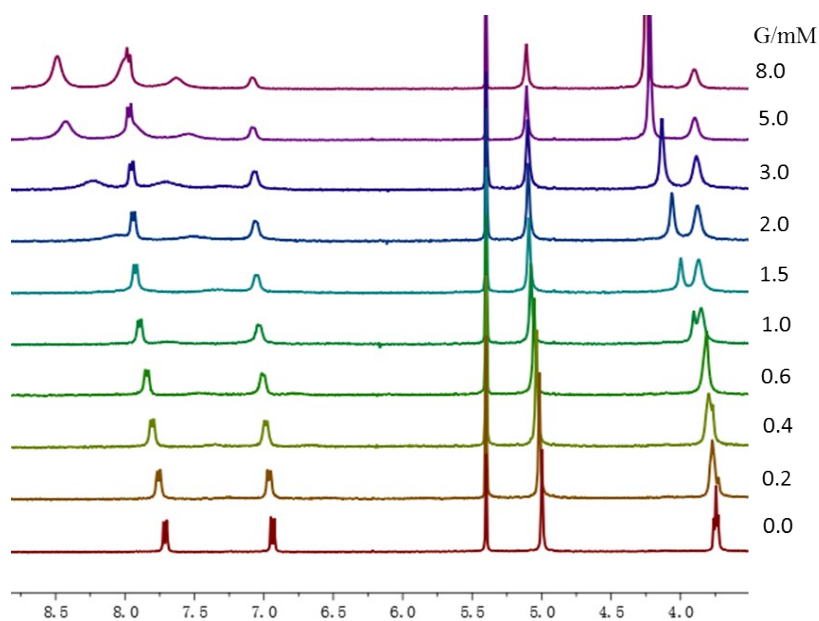

**Fig. S40** Partial  $^1\text{H}$  NMR spectra (400 MHz,  $\text{CD}_2\text{Cl}_2:\text{CD}_3\text{CN}=1:1$ , 298 K) of **TA4** (0.5 mM) titrated by **10-2PF<sub>6</sub>**. From bottom to top, the concentrations of **10-2PF<sub>6</sub>** are in the range of 0~8.0 mM.

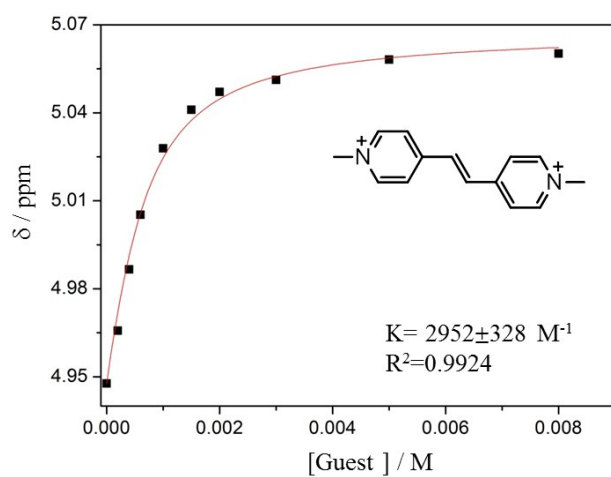

**Fig. S41** Non-linear curve-fitting for the complexation between **TA4** and **10-2PF<sub>6</sub>** in the 1:1 mixture of  $\text{CD}_2\text{Cl}_2$  and  $\text{CD}_3\text{CN}$  at 298 K.

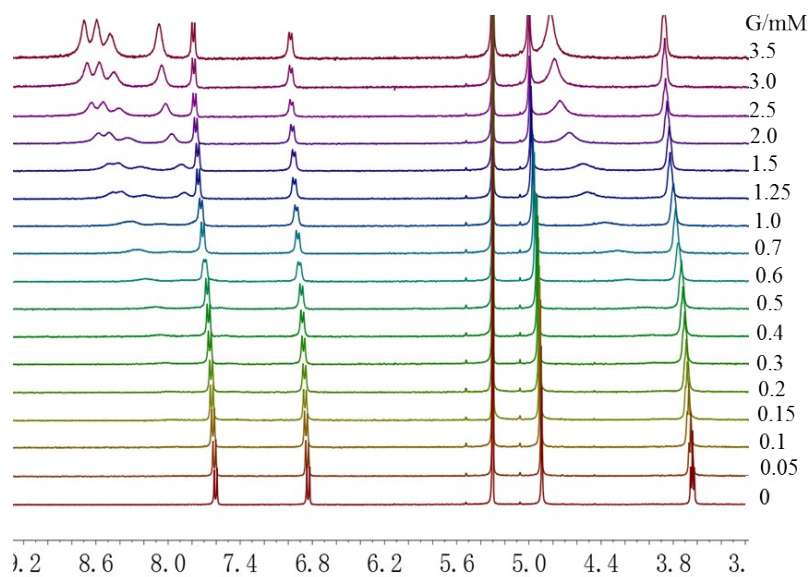

**Fig. S42** Partial  $^1\text{H}$  NMR spectra (400 MHz,  $\text{CD}_2\text{Cl}_2:\text{CD}_3\text{CN}=1:1$ , 298 K) of **TA4** (0.5 mM) titrated by **11-2PF<sub>6</sub>**. From bottom to top, the concentrations of **11-2PF<sub>6</sub>** are in the range of 0~3.5 mM.

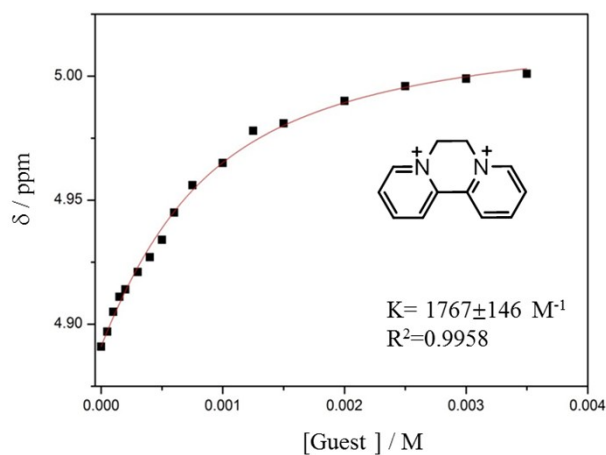

**Fig. S43** Non-linear curve-fitting for the complexation between **TA4** and **11-2PF<sub>6</sub>** in the 1:1 mixture of  $\text{CD}_2\text{Cl}_2$  and  $\text{CD}_3\text{CN}$  at 298 K.

## 6. Solvent-Dependent NMR Spectra

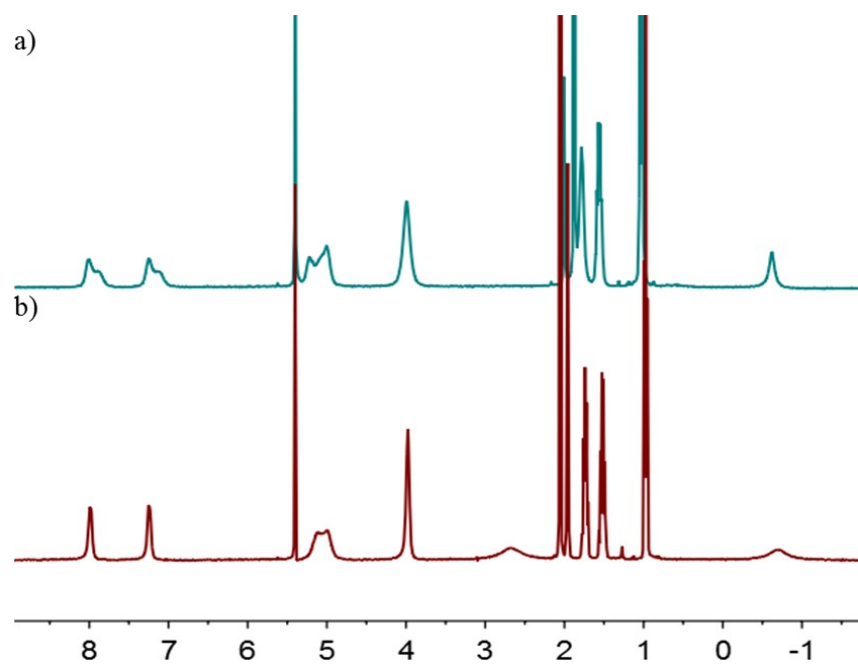

**Fig. S44** <sup>1</sup>H NMR spectra (400 MHz, 2.0 mM, 298 K) of the equimolar mixture of 1-PF<sub>6</sub>@TA4 in the (a) 5:1 or (b) 1:1 mixture of CD<sub>2</sub>Cl<sub>2</sub> and CD<sub>3</sub>CN.

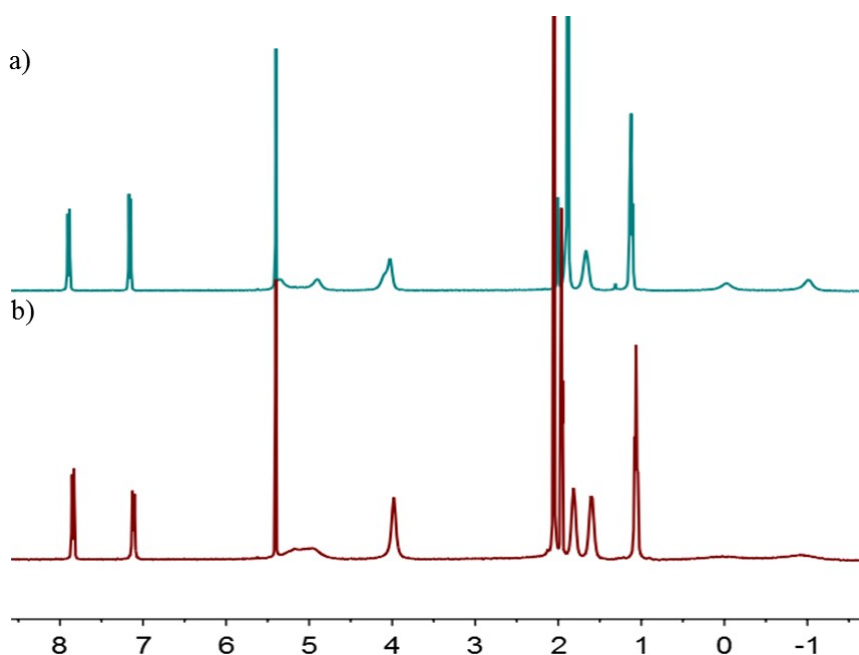

**Fig. S45** <sup>1</sup>H NMR spectra (400 MHz, 2.0 mM, 298 K) of the equimolar mixture of 2-PF<sub>6</sub>@TA4 in the (a) 5:1 or (b) 1:1 mixture of CD<sub>2</sub>Cl<sub>2</sub> and CD<sub>3</sub>CN.

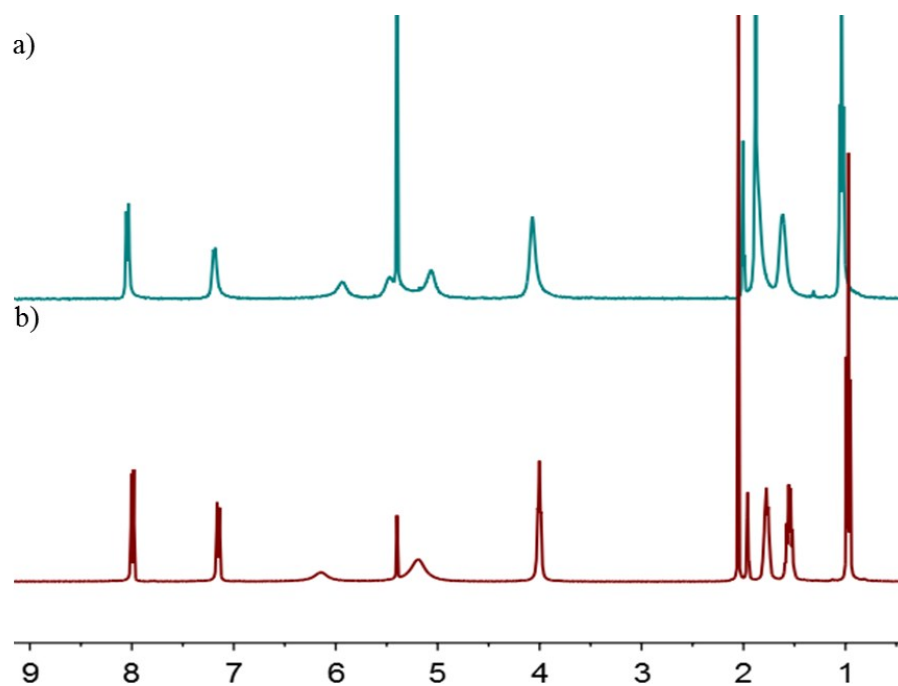

**Fig. S46** <sup>1</sup>H NMR spectra (400 MHz, 2.0 mM, 298 K) of the equimolar mixture of 5-PF<sub>6</sub>@TA4 in the (a) 5:1 or (b) 1:1 mixture of CD<sub>2</sub>Cl<sub>2</sub> and CD<sub>3</sub>CN.

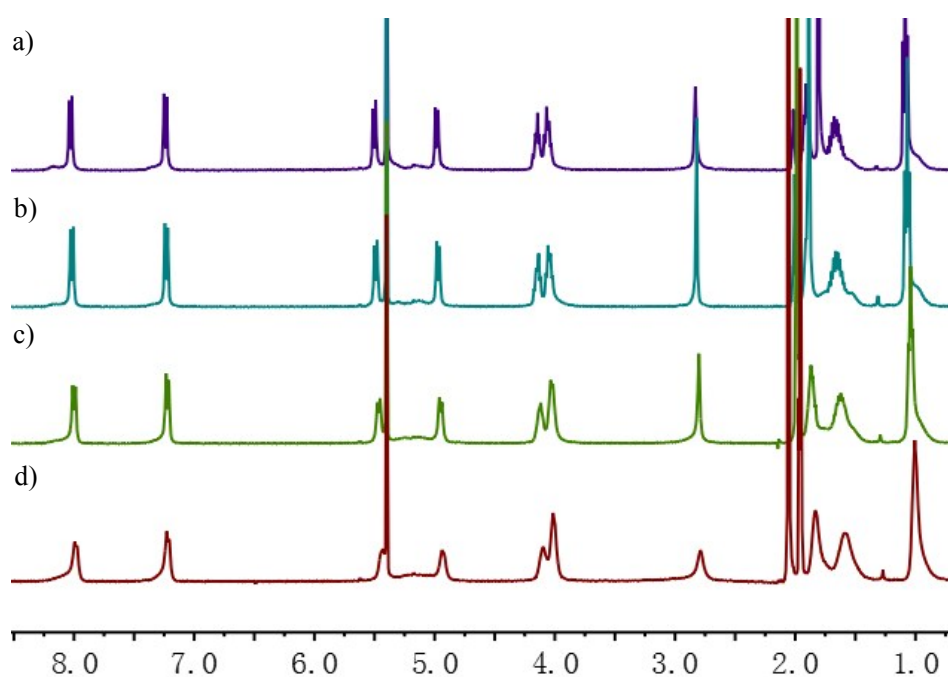

**Fig. S47** <sup>1</sup>H NMR spectra (400 MHz, 2.0 mM, 298 K) of the equimolar mixture of 6-PF<sub>6</sub>@TA4 in the (a) 10:1, (b) 5:1, (c) 2:1 or (d) 1:1 mixture of CD<sub>2</sub>Cl<sub>2</sub> and CD<sub>3</sub>CN.



## 7. 2D NMR Spectra of the Complexes

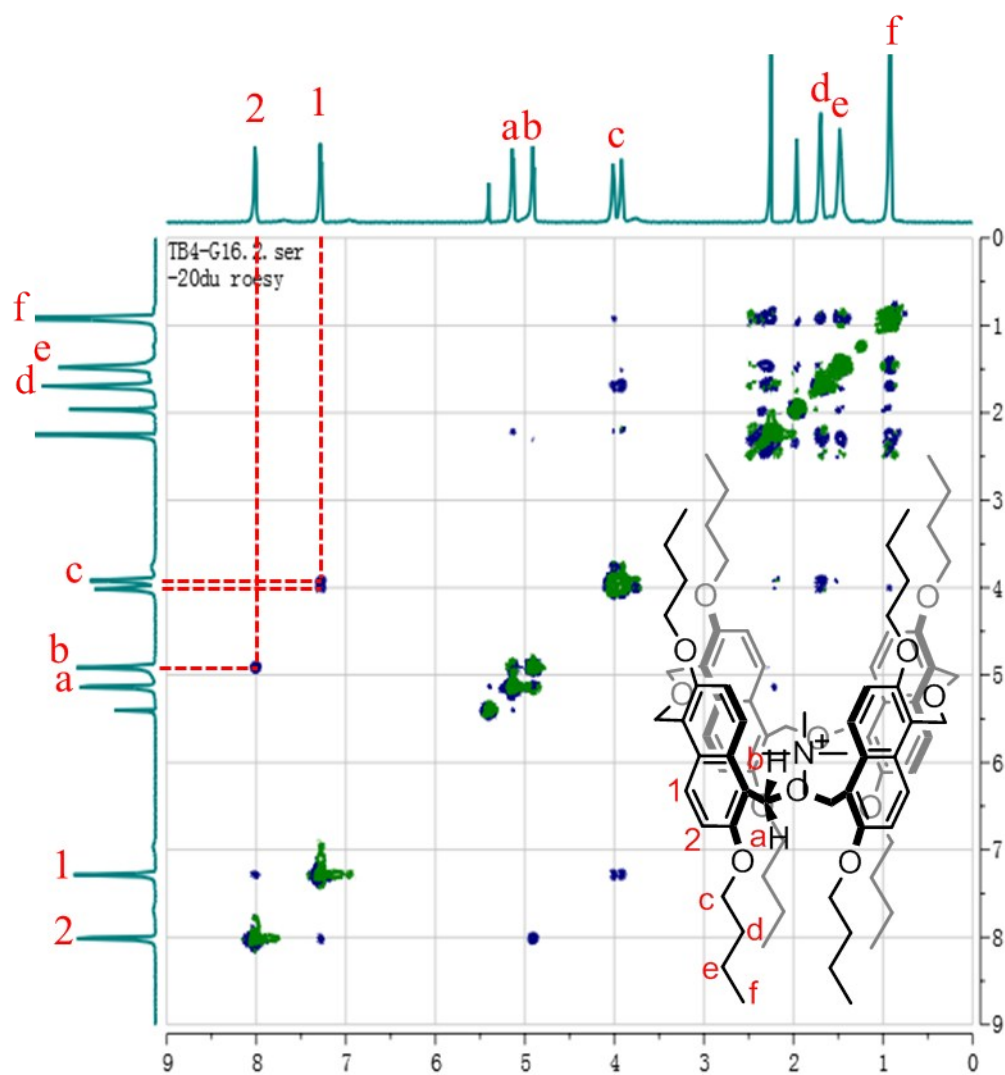

**Fig. S48**  $^1\text{H}$ ,  $^1\text{H}$ -ROESY NMR spectra (600 MHz,  $\text{CD}_2\text{Cl}_2:\text{CD}_3\text{CN}=1:1$ , 6.0 mM,) of **1-PF<sub>6</sub>@TA4** at  $-20^\circ\text{C}$ . This result supports that **TA4** in this complex predominantly exists as conformation **I**.

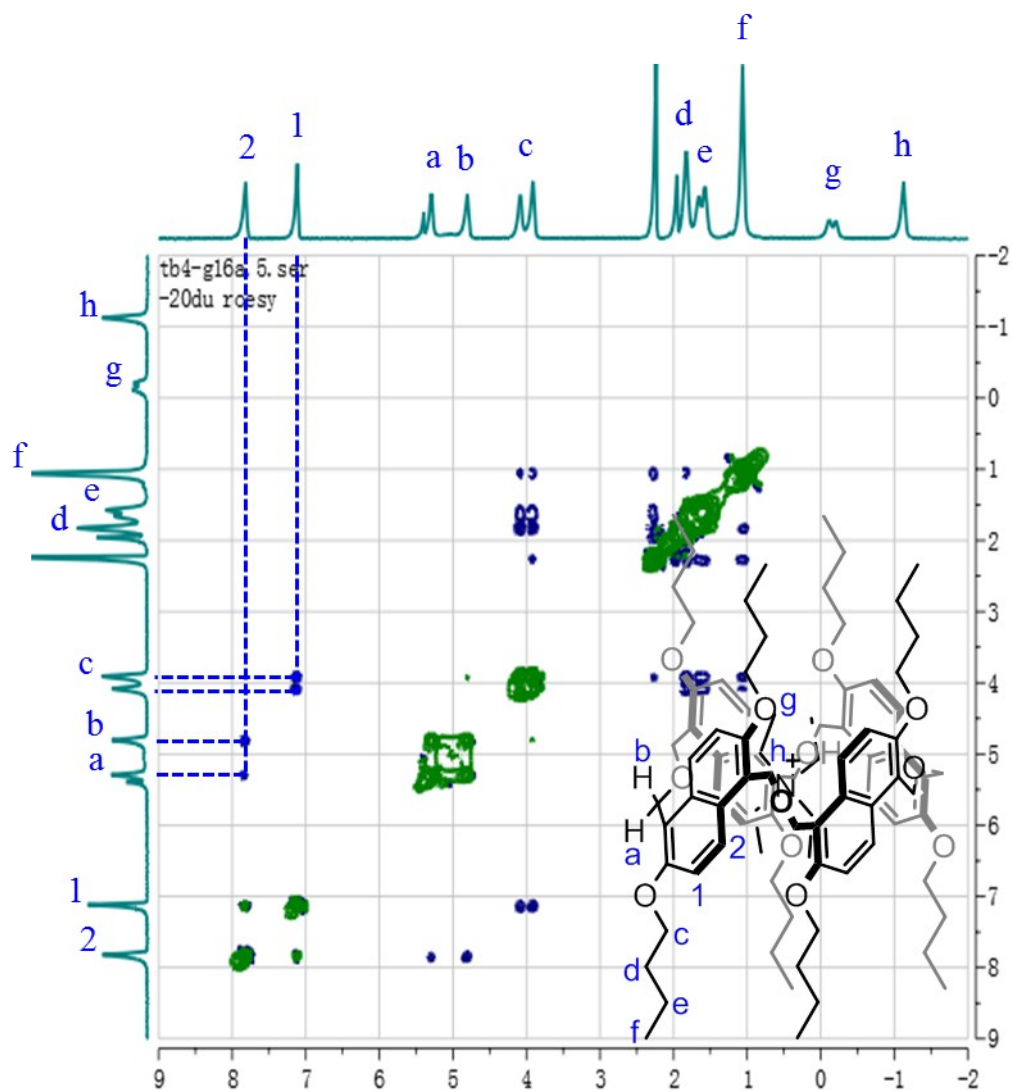

**Fig. S49**  $^1\text{H}, ^1\text{H}$ -ROESY NMR spectra (600 MHz,  $\text{CD}_2\text{Cl}_2:\text{CD}_3\text{CN}=1:1$ , 6.0 mM,) of **2-PF<sub>6</sub>@TA4** at  $-20^\circ\text{C}$ . This result supports that **TA4** in this complex predominantly exists as conformation **IV**.

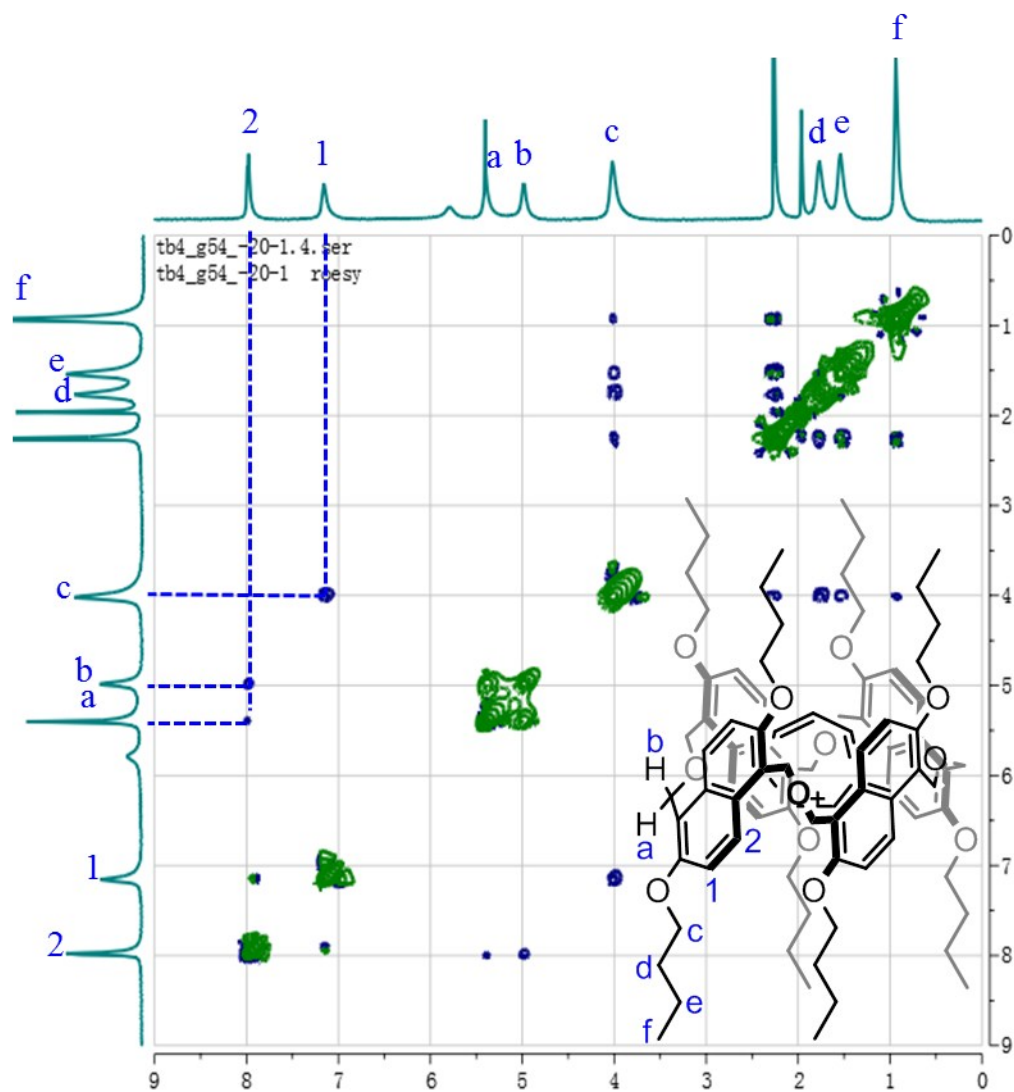

**Fig. S50**  $^1\text{H}, ^1\text{H}$ -ROESY NMR spectra (600 MHz,  $\text{CD}_2\text{Cl}_2:\text{CD}_3\text{CN}=1:1$ , 6.0 mM,) of **5-PF<sub>6</sub>@TA4** at  $-20^\circ\text{C}$ . This result supports that **TA4** in this complex predominantly exists as conformation **IV**.

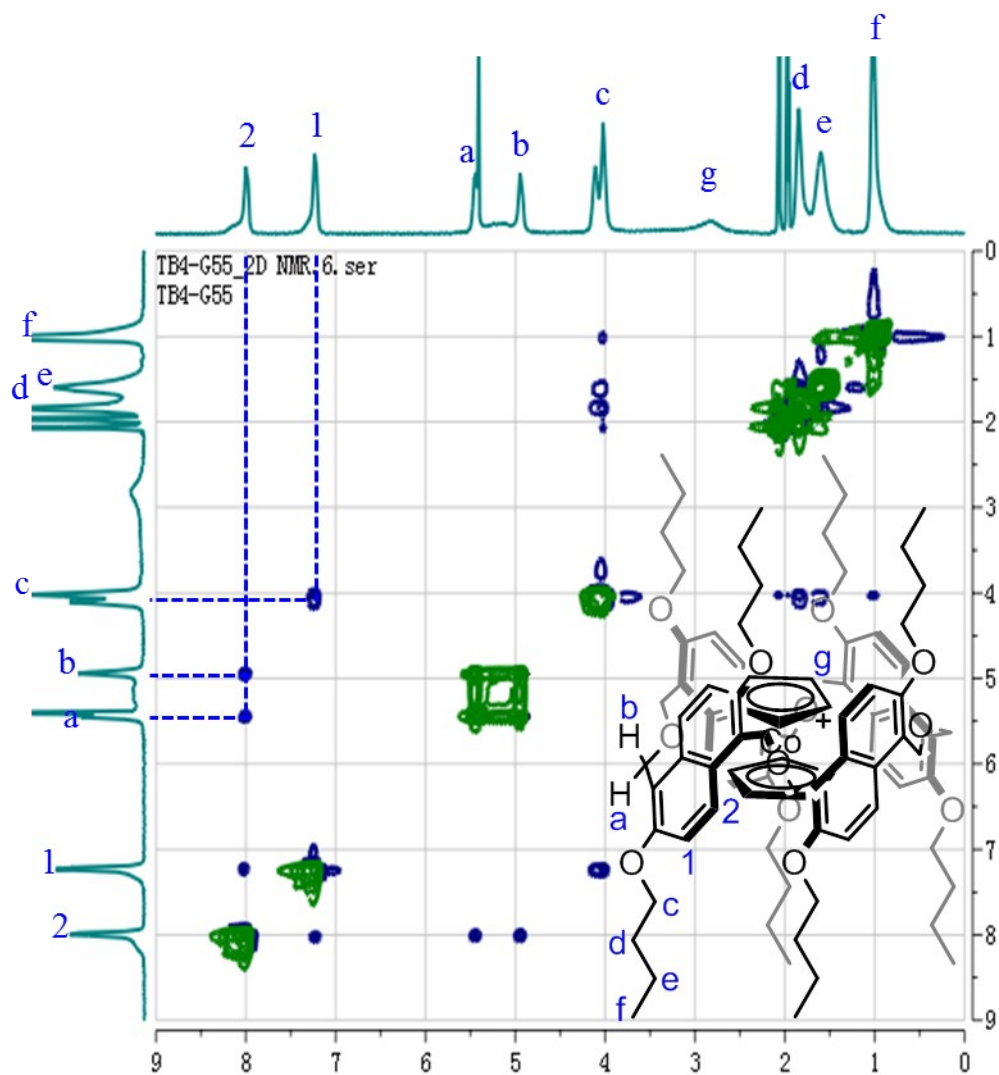

**Fig. S51**  $^1\text{H}, ^1\text{H}$ -ROESY NMR spectra (600 MHz,  $\text{CD}_2\text{Cl}_2:\text{CD}_3\text{CN}=1:1$ , 6.0 mM,) of **6-PF<sub>6</sub>@TA4** at  $-20^\circ\text{C}$ . This result supports that **TA4** in this complex predominantly exists as conformation **IV**.
